# Supplementary material for: Molecular conformational twist-controlled wide fluorescence tuning and white light emission in a single fluorophore via halochromism
Source: Royal Society of Chemistry journal article supplement (doi:10.1039/d1nj04911a), 2021-01-01
Supplement: d1nj04911a1.pdf [file d1nj04911a1.pdf]

## Electronic Supplementary Information (ESI)

### Molecular Conformational Twist Dependent Wide Fluorescence Tuning and White Light Emission in a Single Fluorophore via Halochormism

Parthasarathy Gayathri,<sup>a</sup> Probal Nag,<sup>b</sup> Neethu Anand,<sup>b</sup> Sivaranjana Reddy Vennapusa,<sup>b</sup> Mehboobali Pannipara,<sup>c,d</sup> Abdullah G. Al-Sehemi,<sup>c,d</sup> Dohyun Moon\*<sup>e</sup> Savarimuthu Philip Anthony\*<sup>a</sup>

<sup>a</sup>)School of Chemical & Biotechnology, SASTRA Deemed University, Thanjavur-613401, Tamil Nadu, India. Fax: +914362264120; Tel: +914362264101; E-mail: philip@biotech.sastra.edu

<sup>b</sup>)School of chemistry, Indian Institute of Science Education and Research, Thiruvananthapuram, Kerala-695551, India

<sup>b</sup>)Department of chemistry, King Khalid University, Abha 61413, Saudi Arabia.

<sup>c</sup>)Research center for Advanced Materials Science, King Khalid University, Abha 61413, Saudi Arabia.

<sup>b</sup>)Beamline Department, Pohang Accelerator Laboratory, 80 Jigokro-127beongil, Nam-gu, Pohang, Gyeongbuk, Korea, Email: dmoon@postech.ac.kr

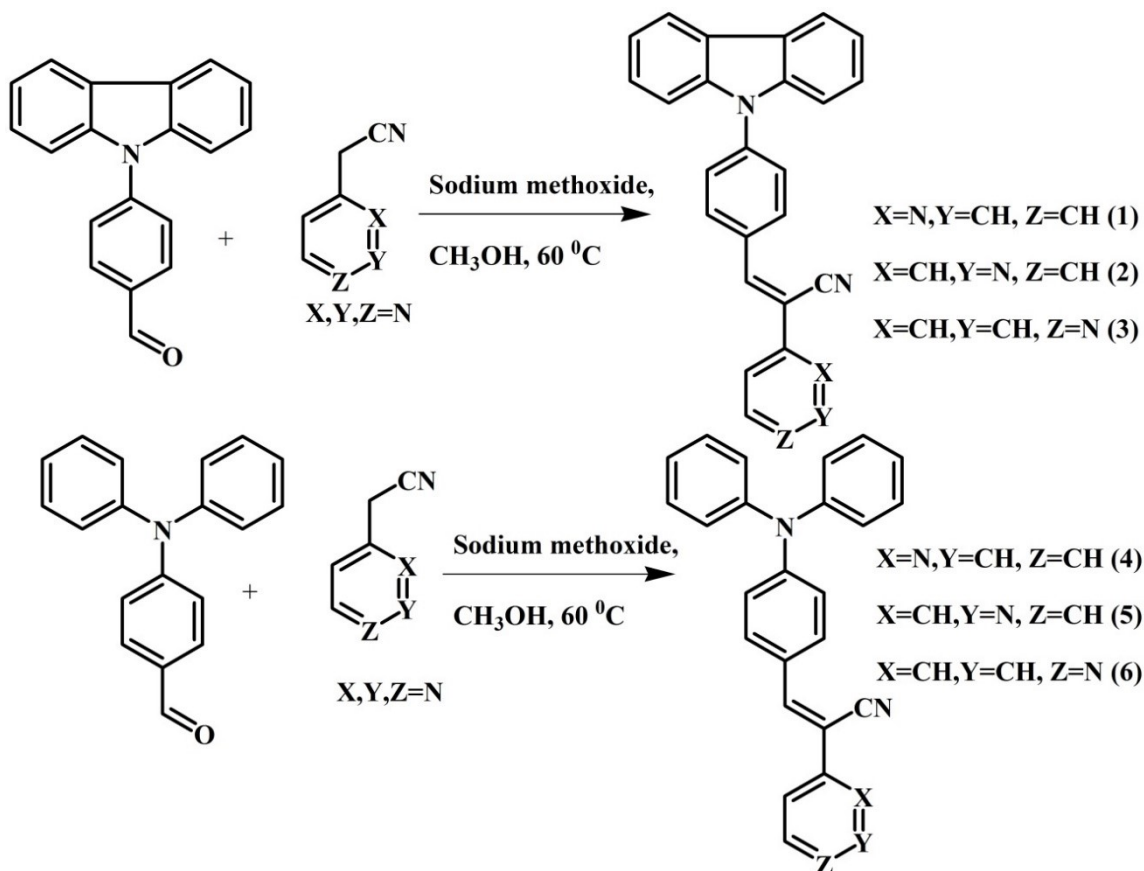



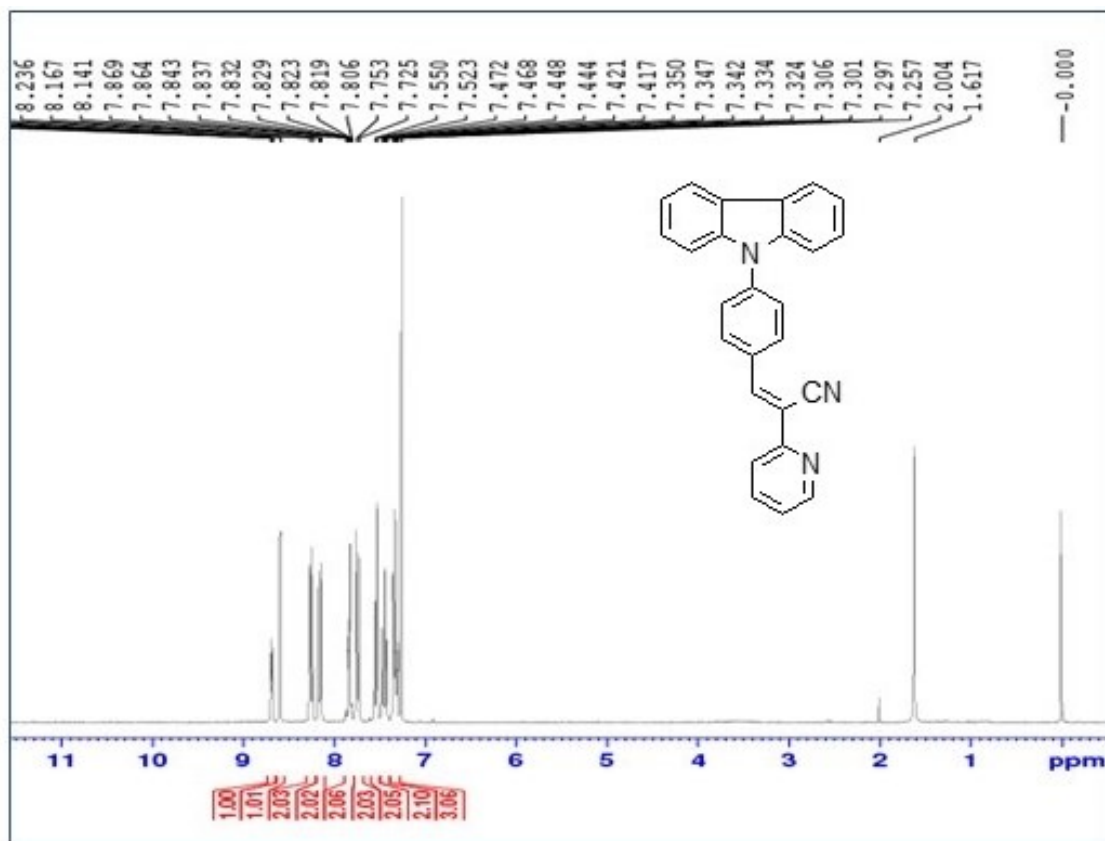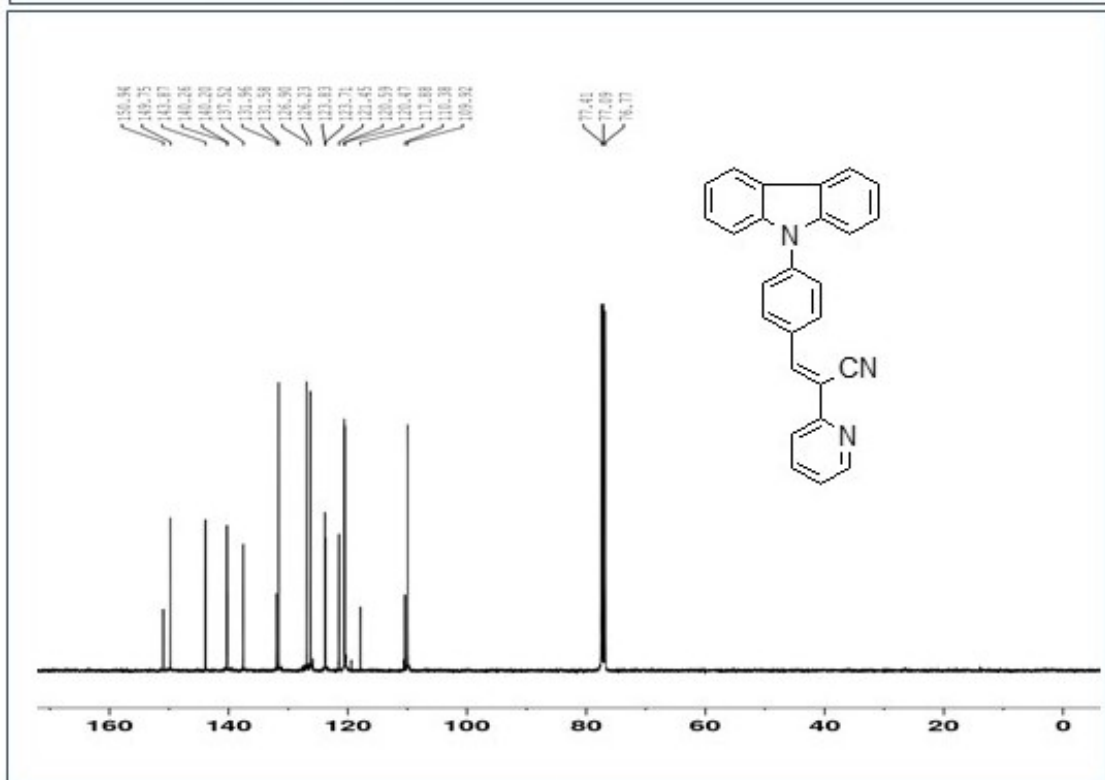



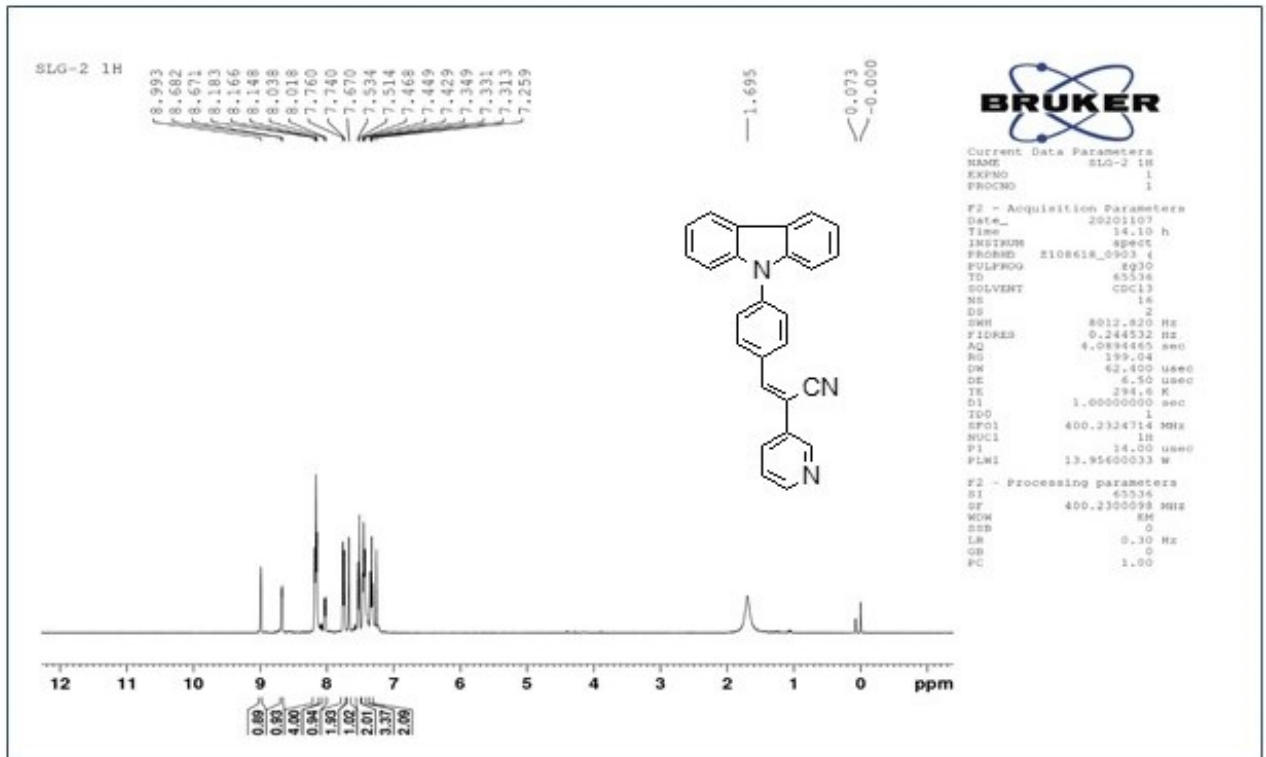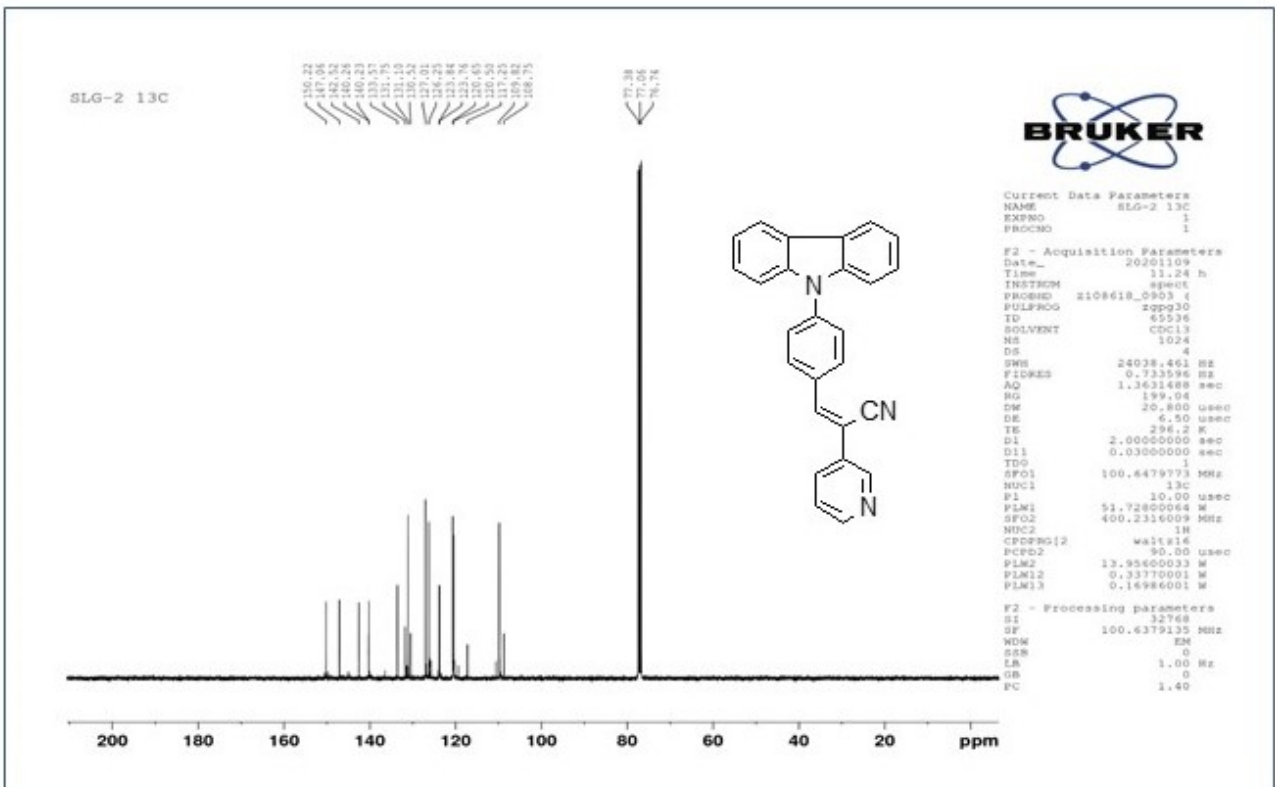

$^1\text{H}$  and  $^{13}\text{C}$  NMR of **2**.

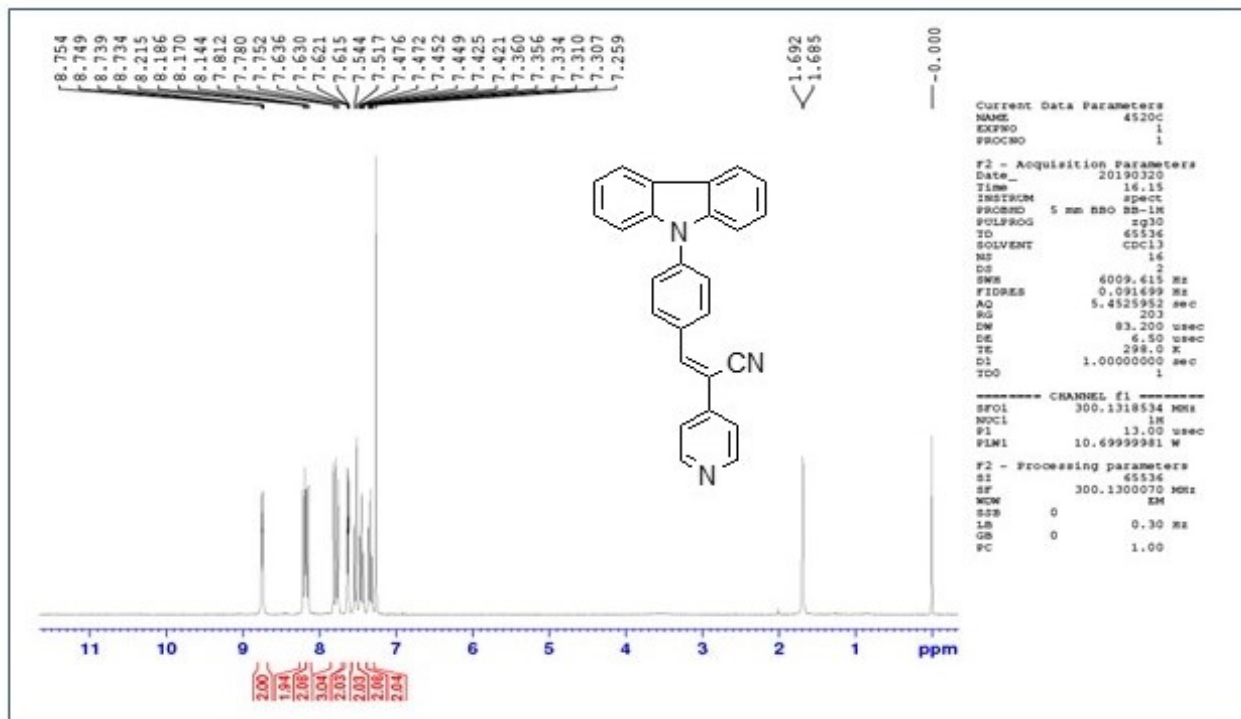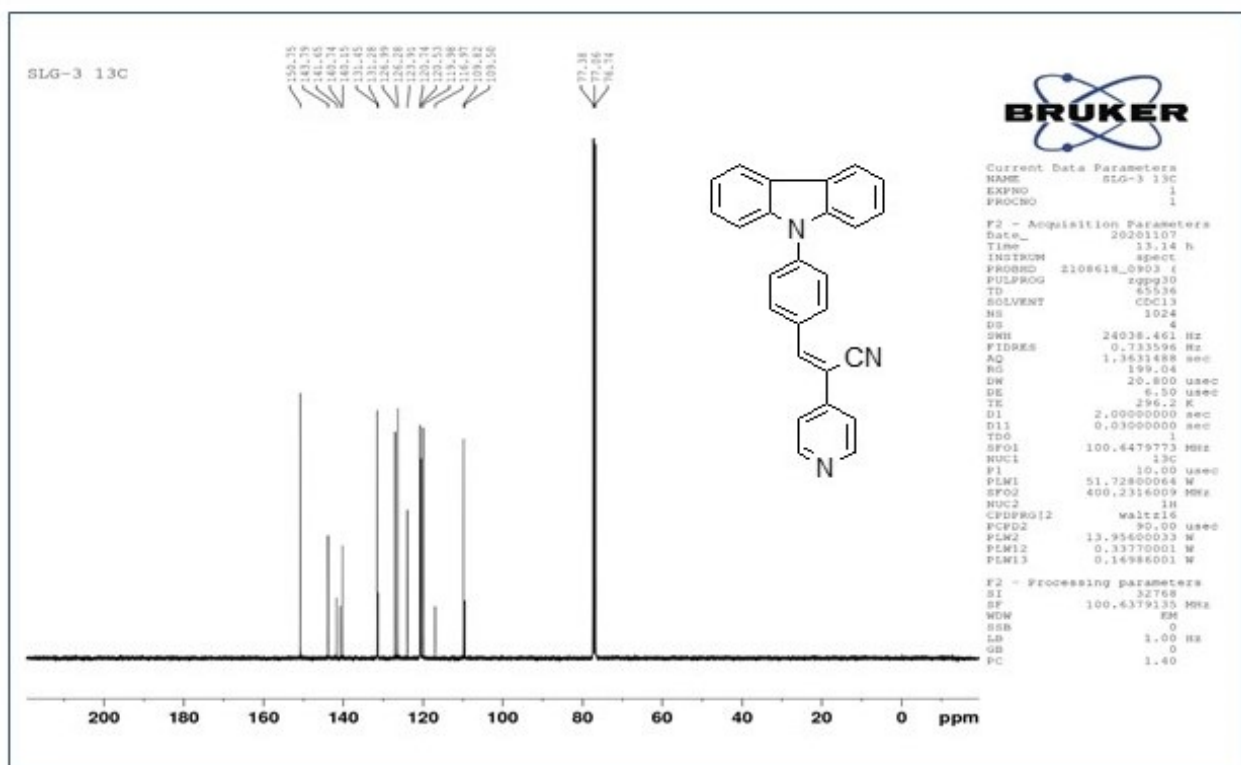

$^1\text{H}$  and  $^{13}\text{C}$  NMR of **3**.



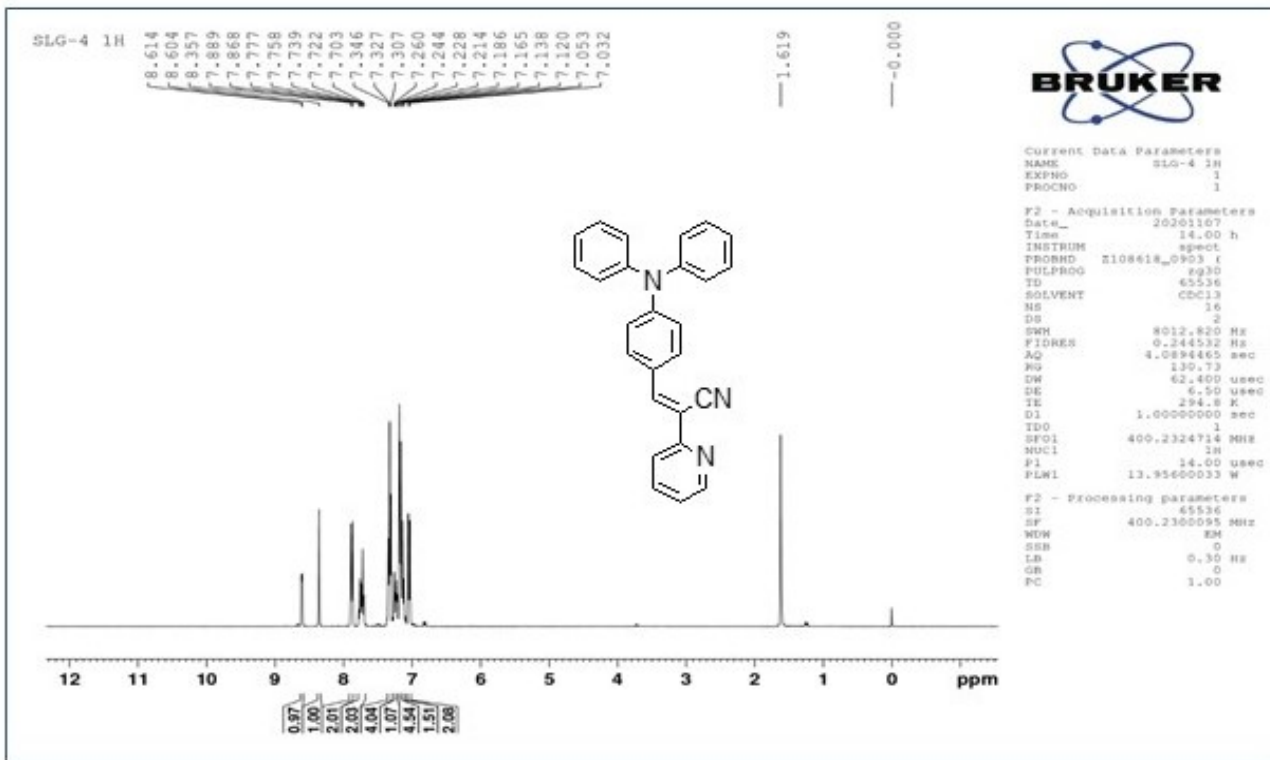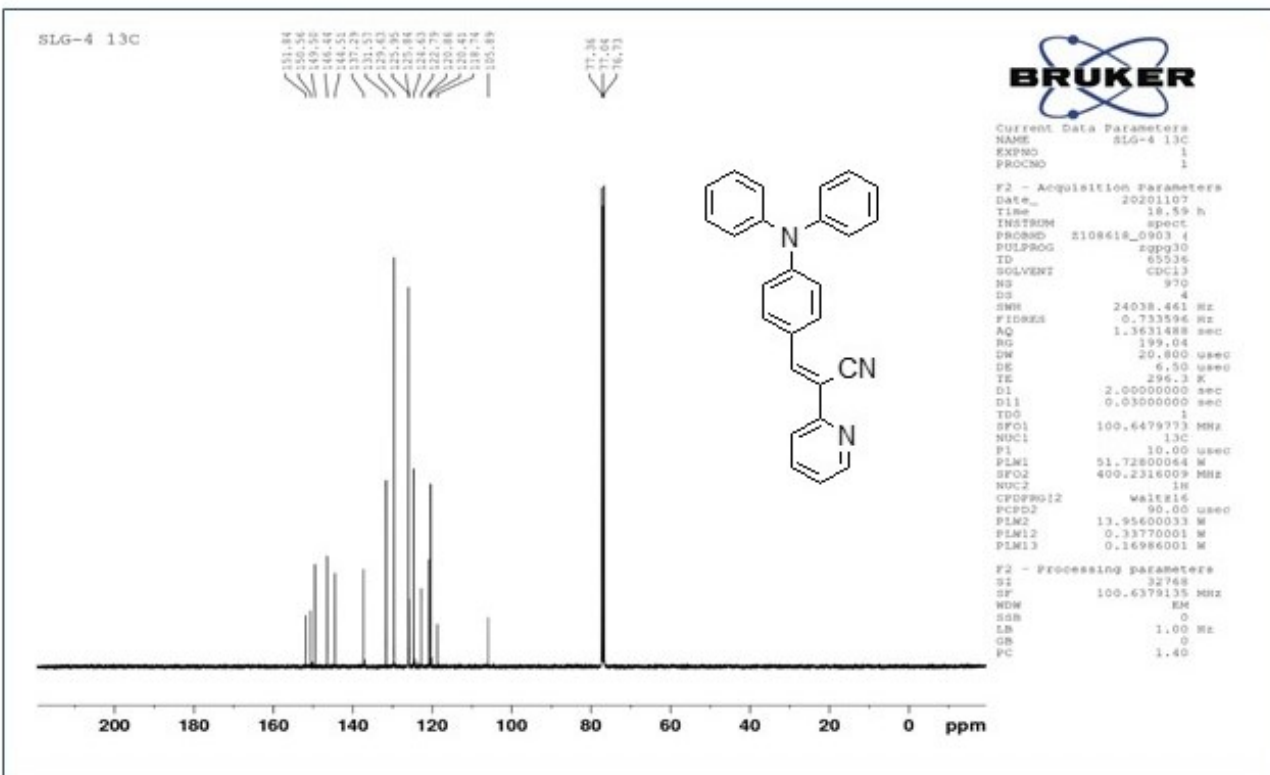

$^1\text{H}$  and  $^{13}\text{C}$  NMR of **4**.

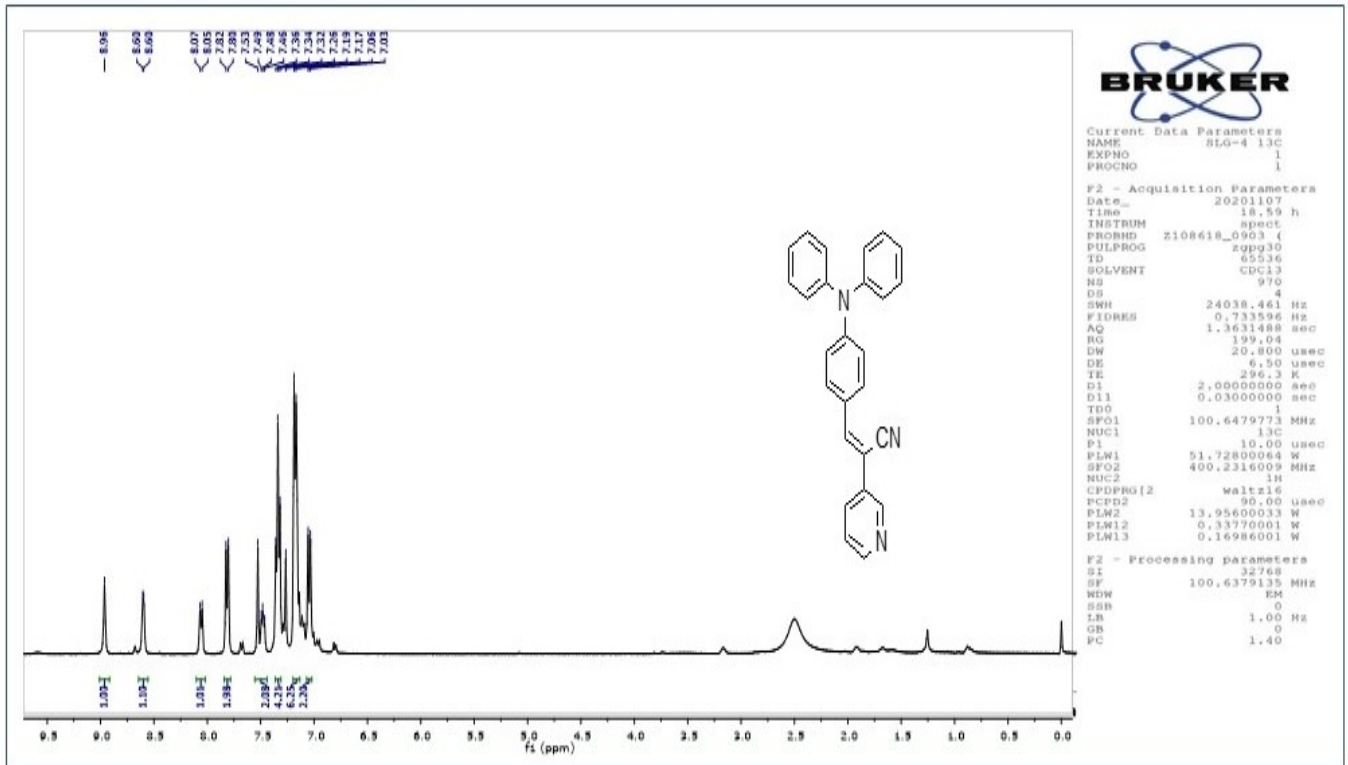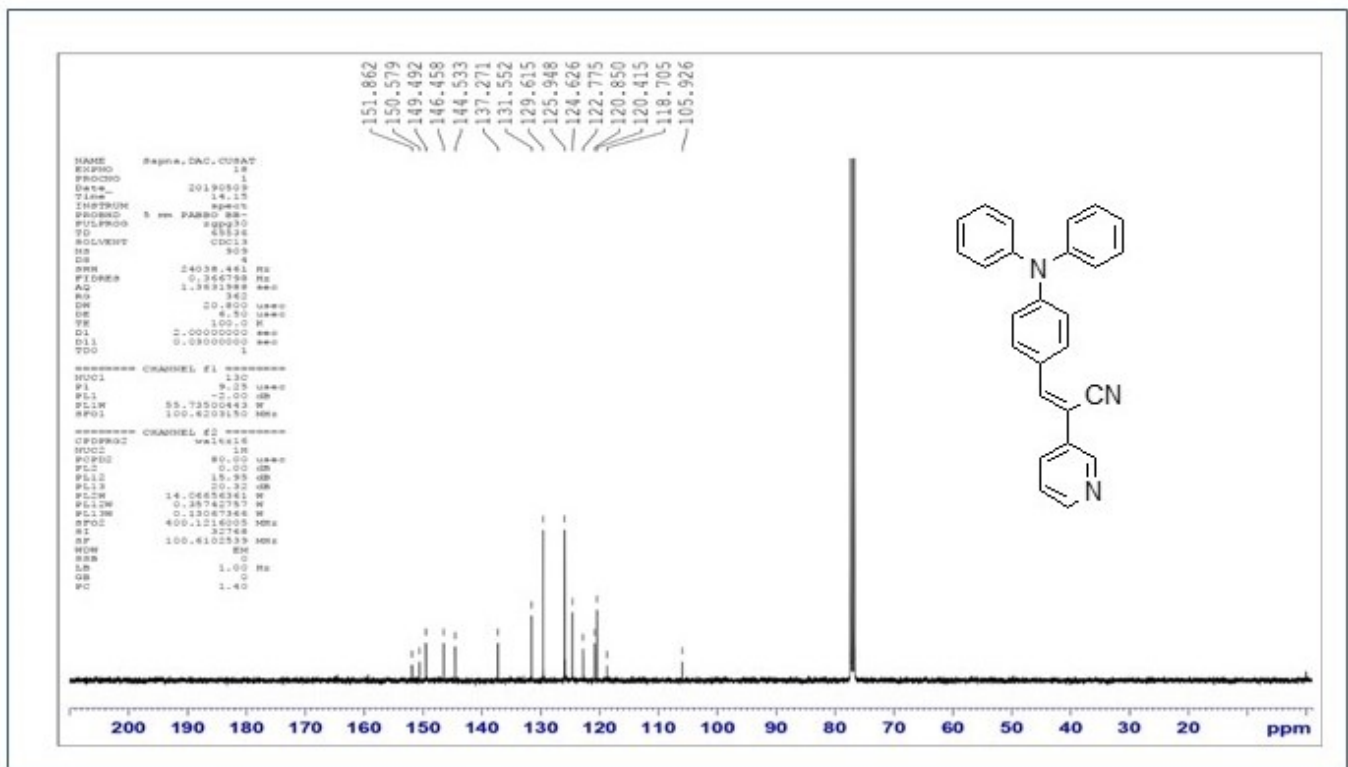

$^1\text{H}$  and  $^{13}\text{C}$  NMR of **5**.

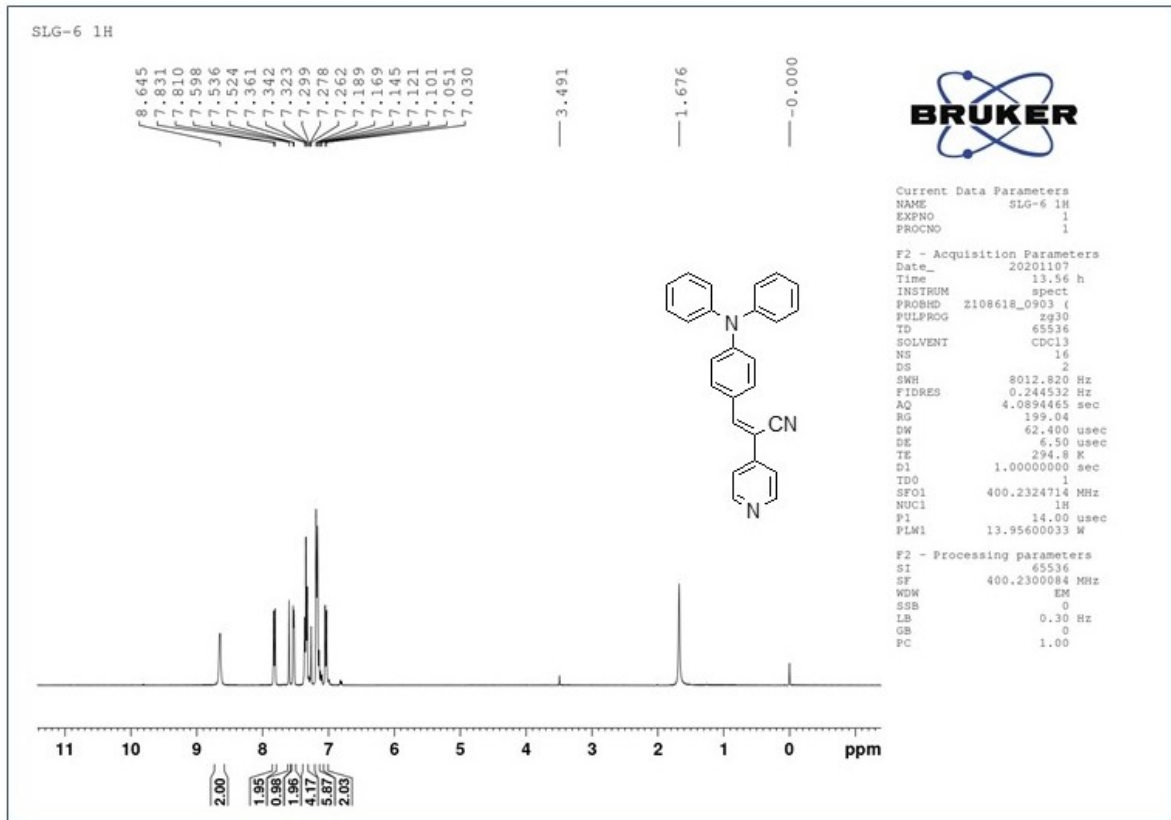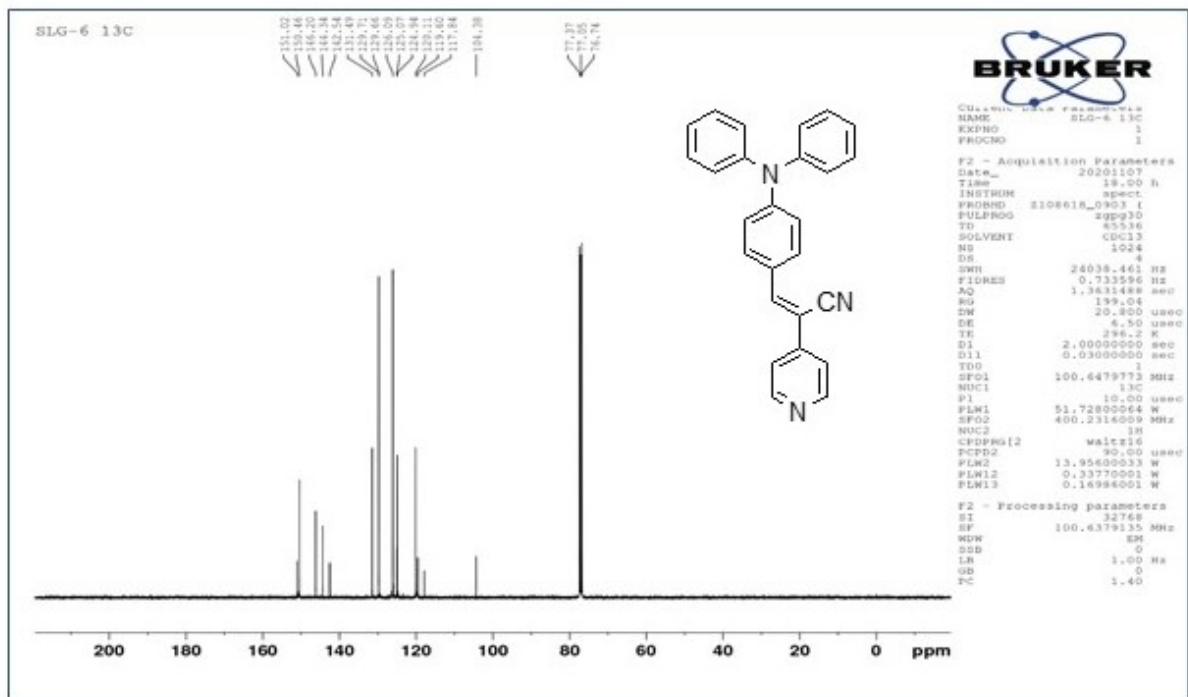

$^1\text{H}$  and  $^{13}\text{C}$  NMR of **6**.

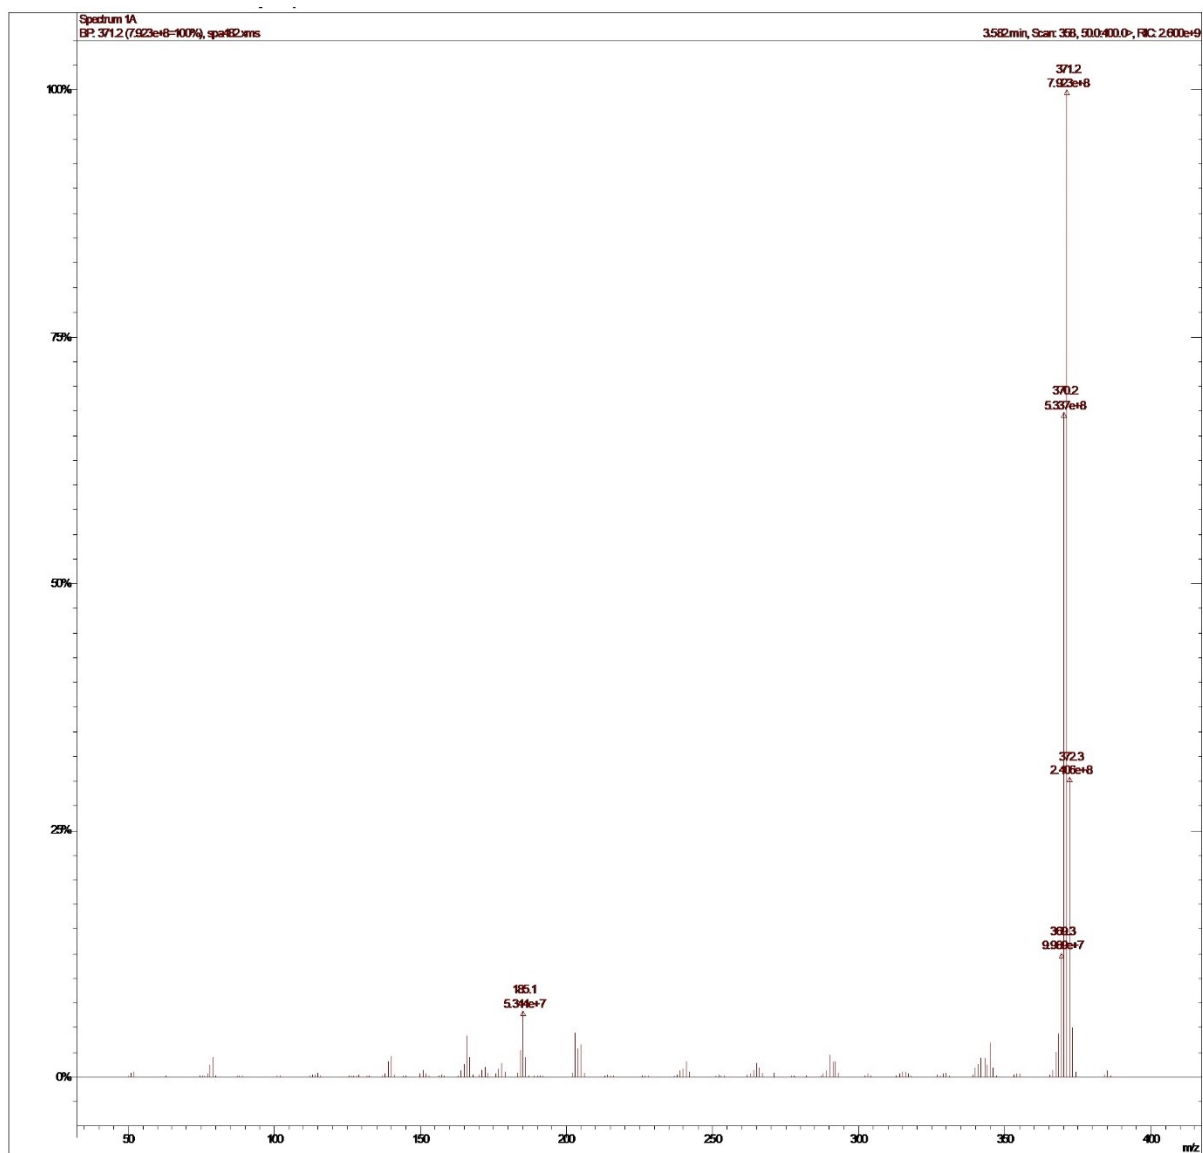

**1**: m/z calculated for  $\text{C}_{26}\text{H}_{17}\text{N}_3$  (M + H): 371.14, found: 371.2

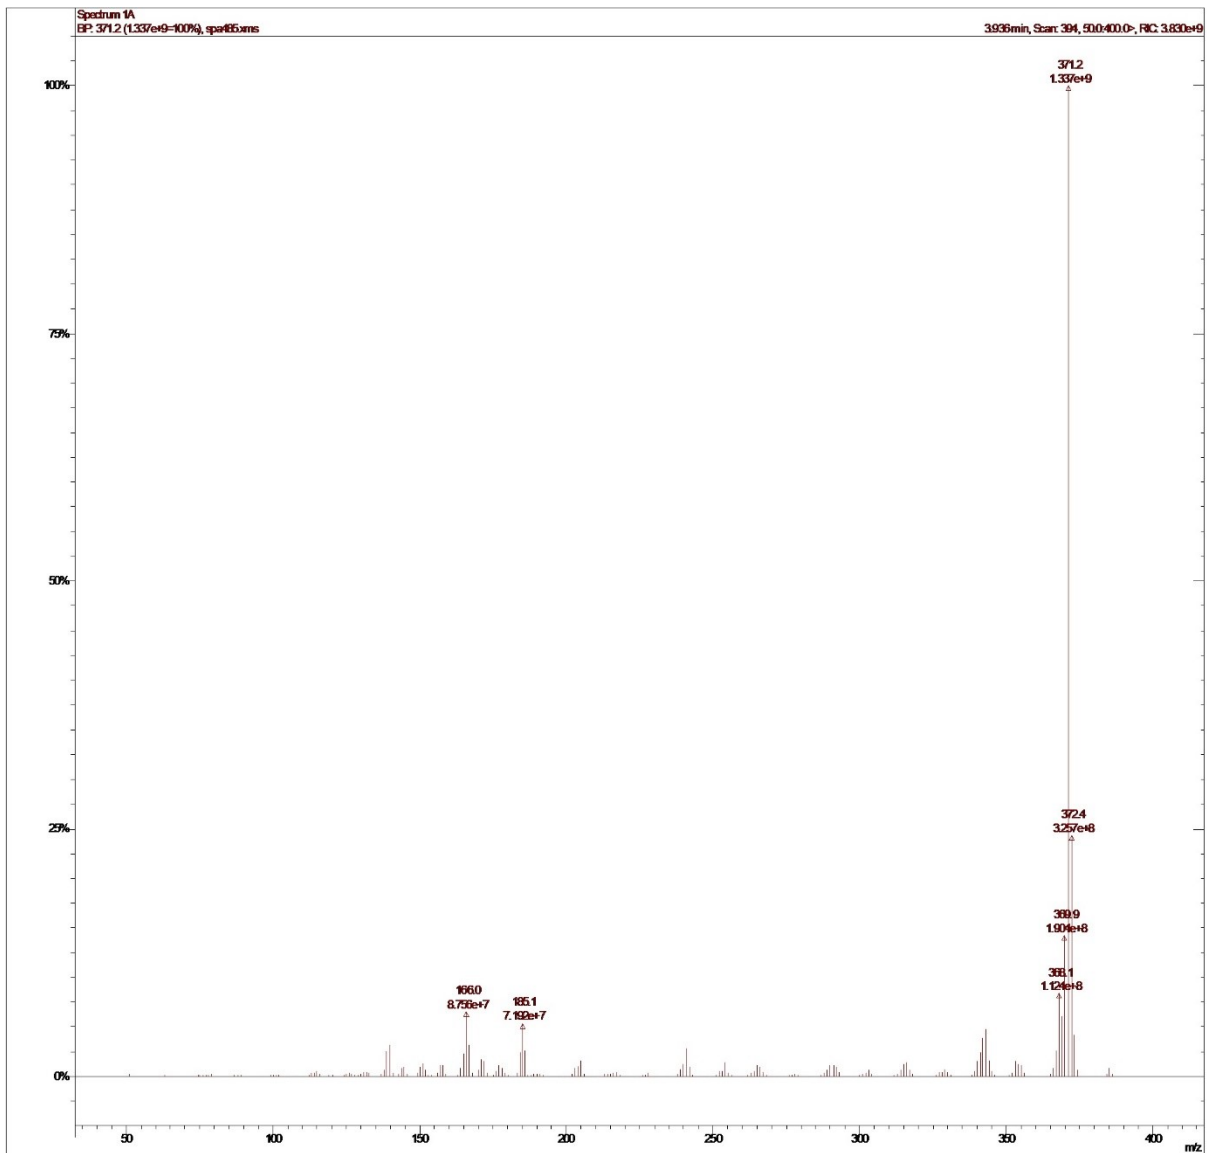

2: m/z calculated for  $C_{26}H_{17}N_3$  (M + H): 371.14, found: 371.2

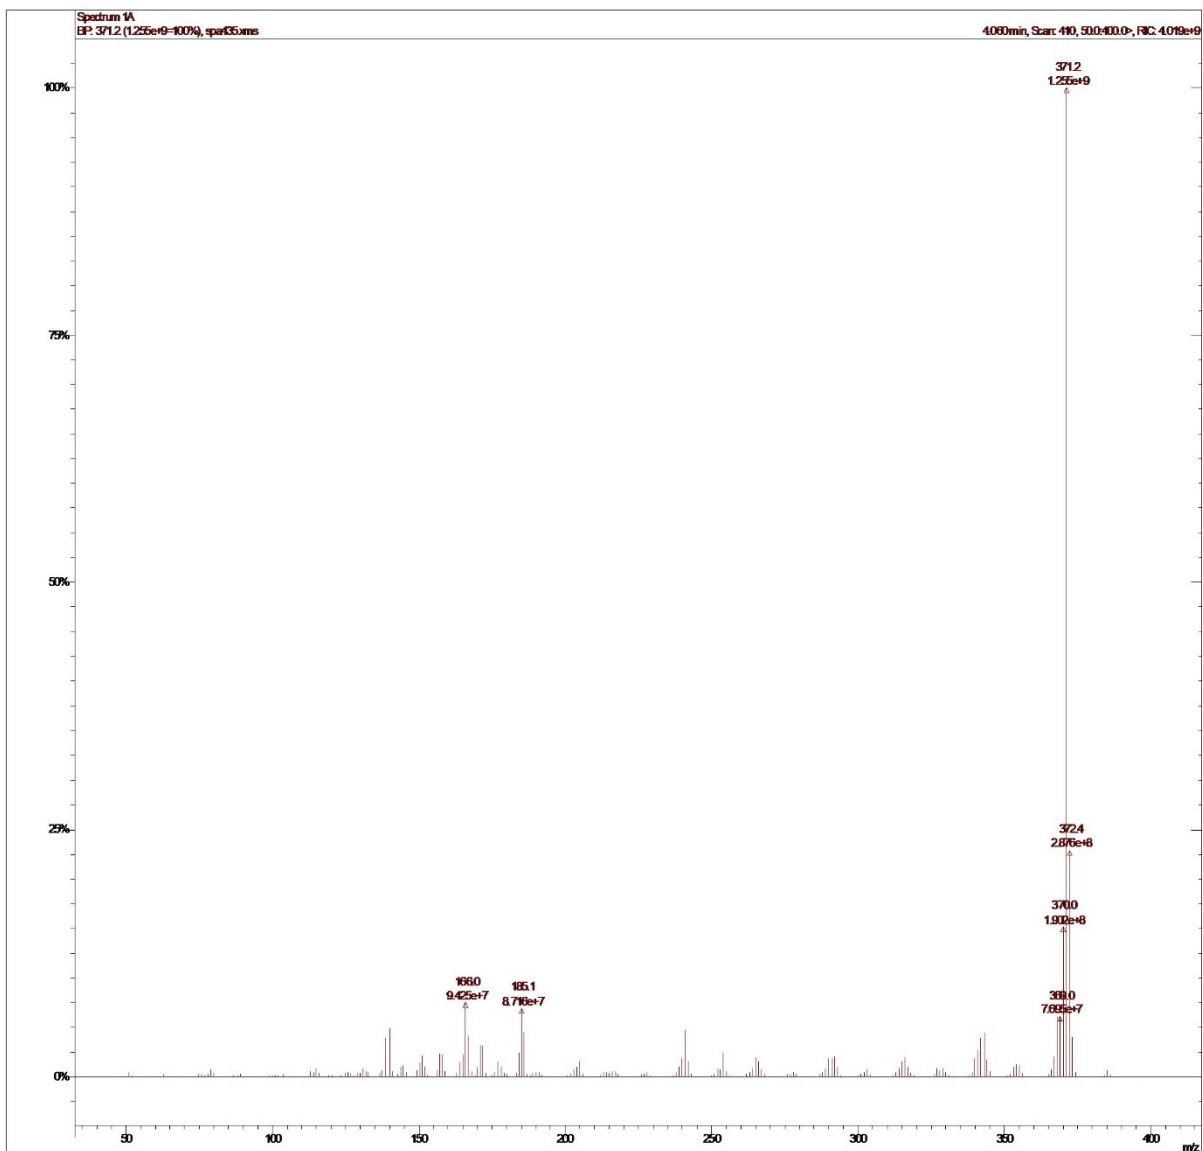

3: m/z calculated for  $C_{26}H_{17}N_3$  (M + H): 371.14, found: 371.2



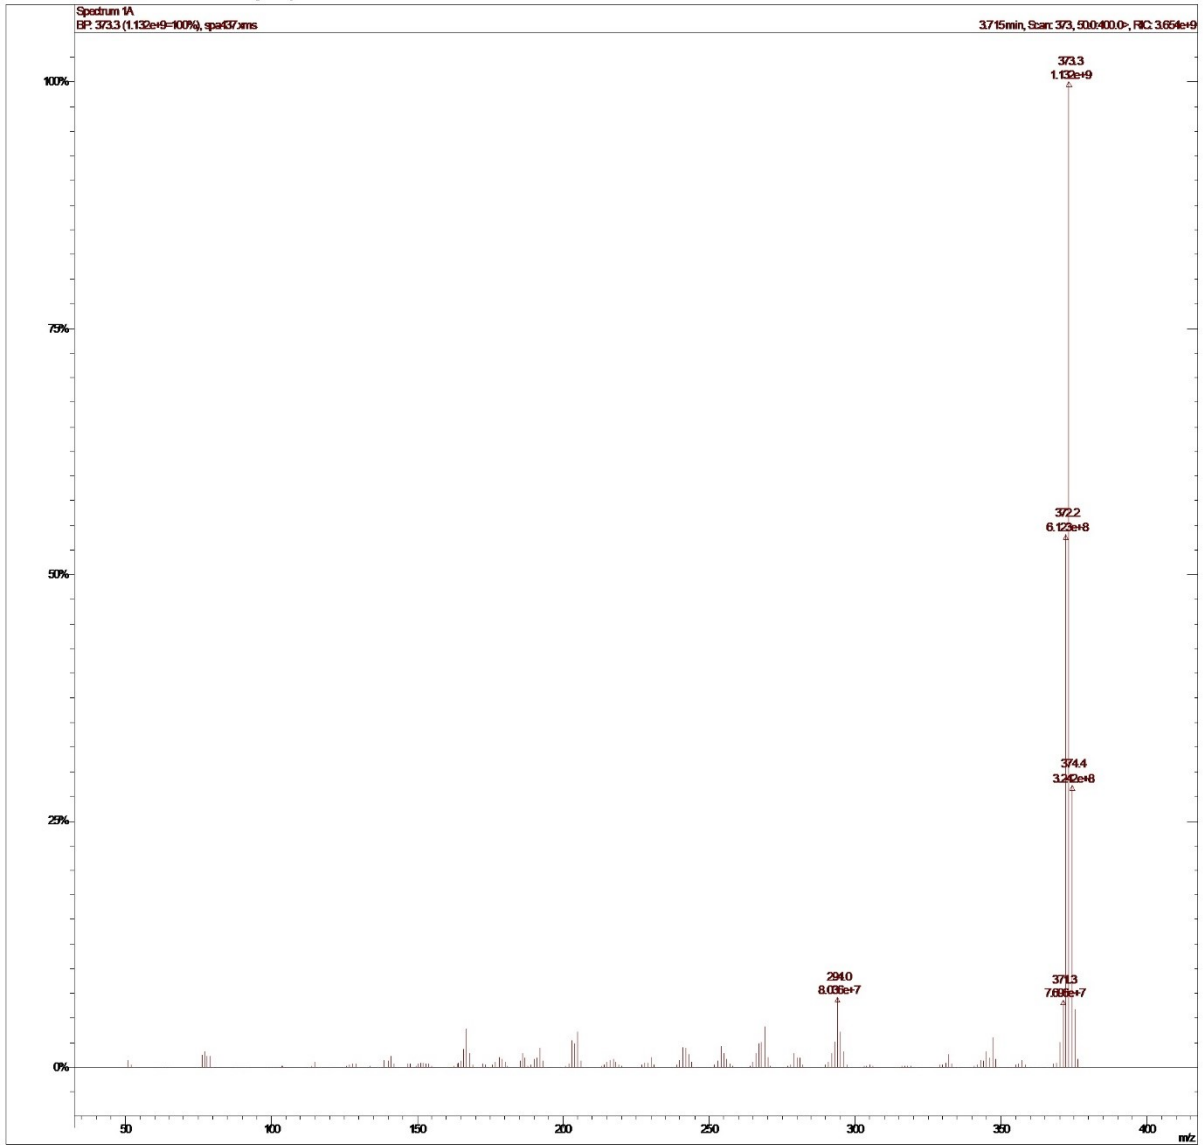

4: m/z calculated for  $C_{26}H_{19}N_3$  (M + H): 373.16, found: 373.3

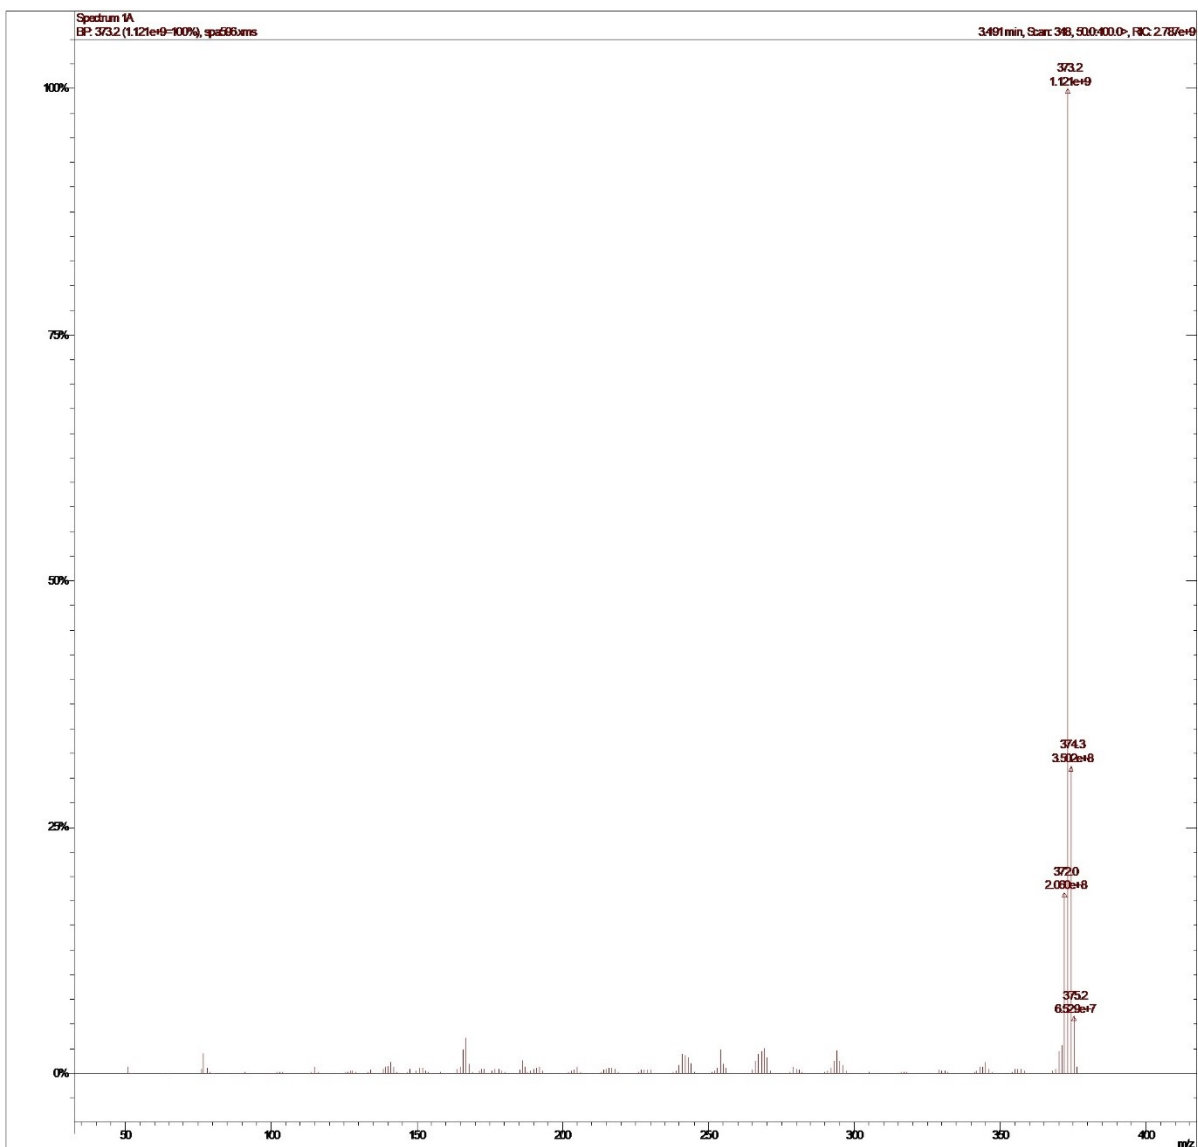

5: m/z calculated for  $C_{26}H_{19}N_3$  (M + H): 373.16, found: 373.2

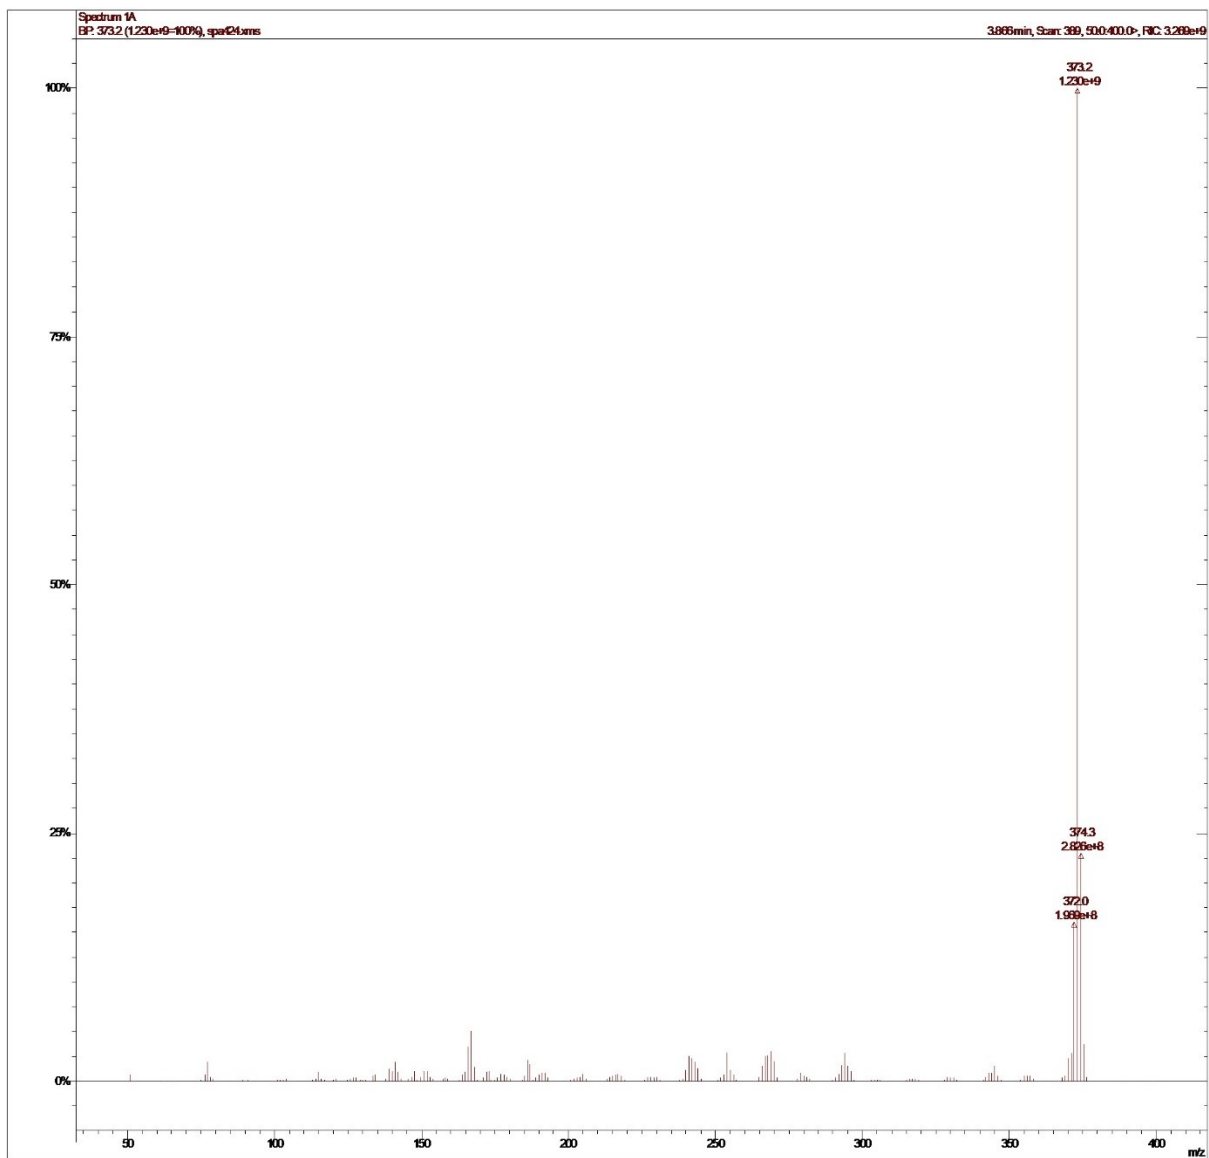

6: m/z calculated for  $C_{26}H_{19}N_3$  (M + H): 373.16, found: 373.2

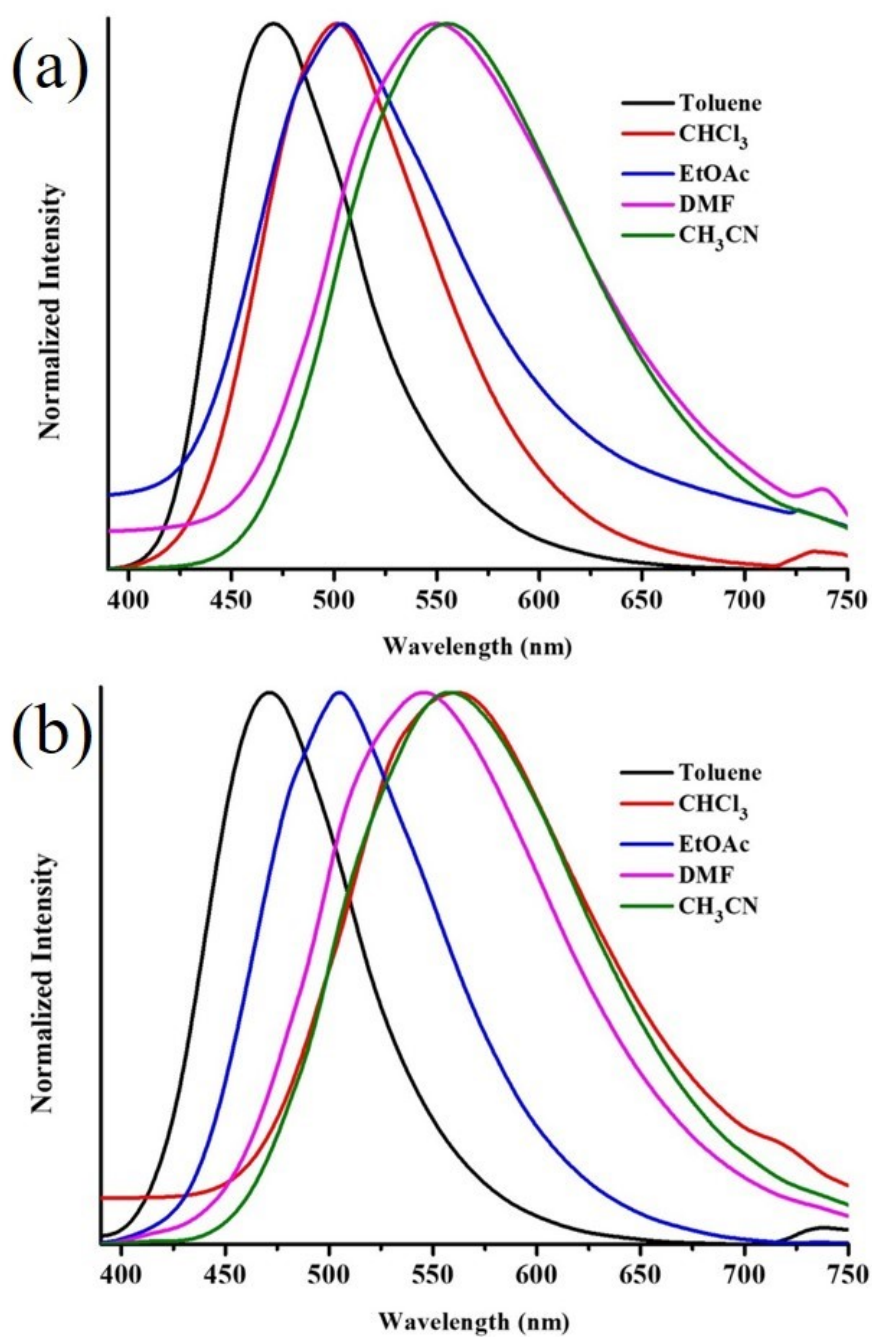

Fig. S1. Fluorescence spectra of (a) **1** and (b) **2** in different solvents ( $10^{-4}$  M).

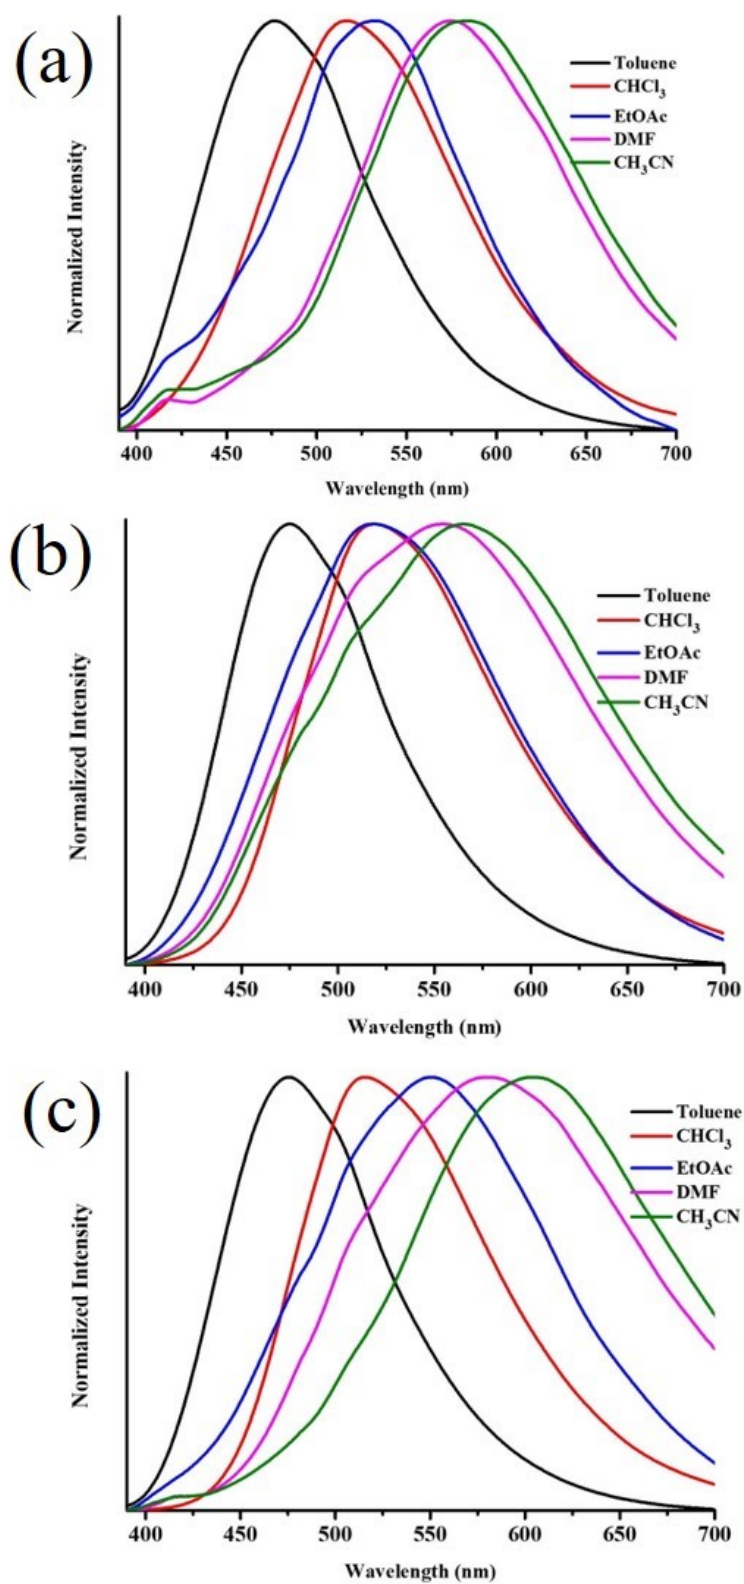

Fig. S2. Fluorescence spectra of (a) 4, (b) 5 and (c) 6 in different solvents ( $10^{-4}$  M).

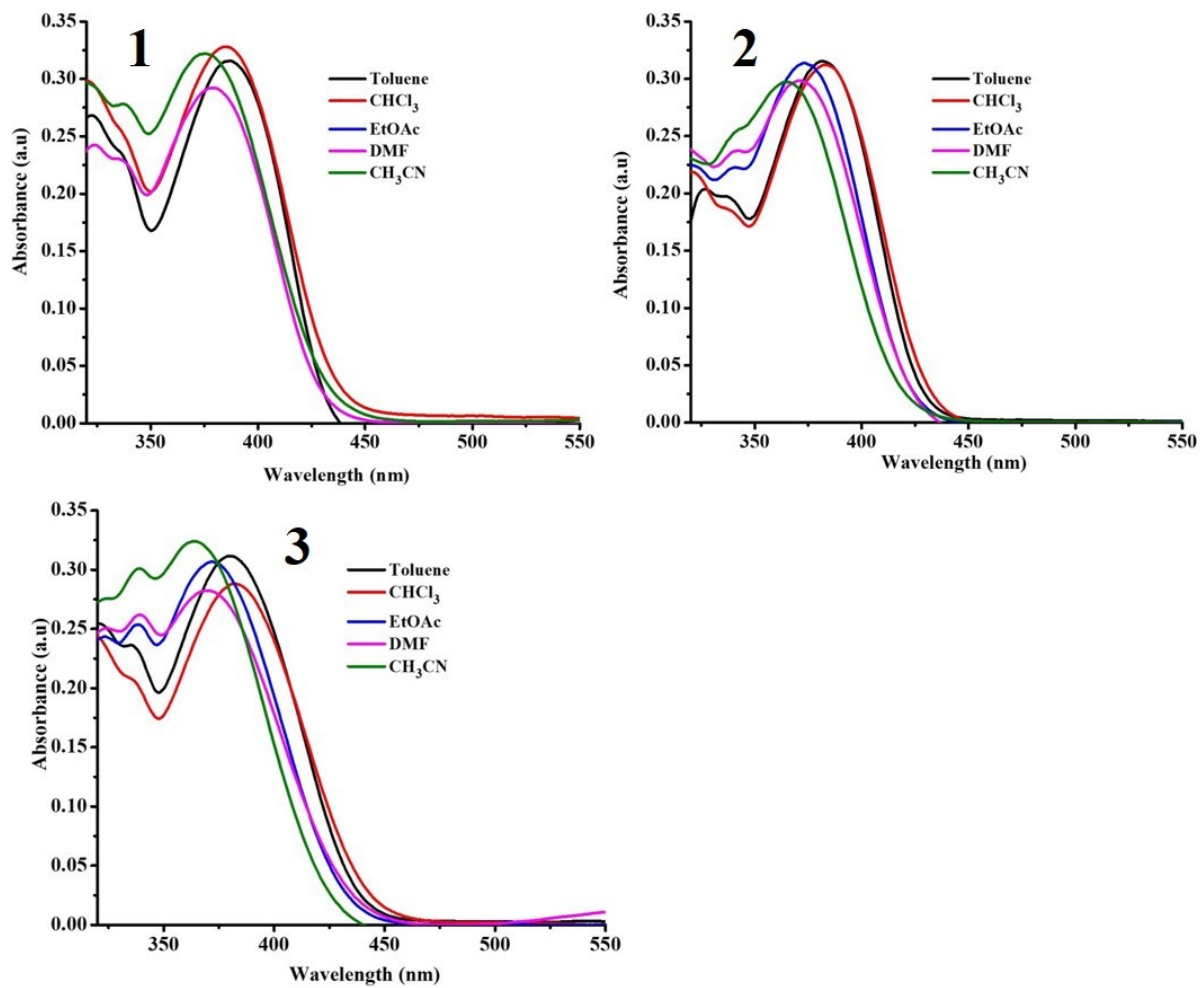

Fig. S3. Absorption spectra of **1-3** in different solvents ( $10^{-4}$  M).

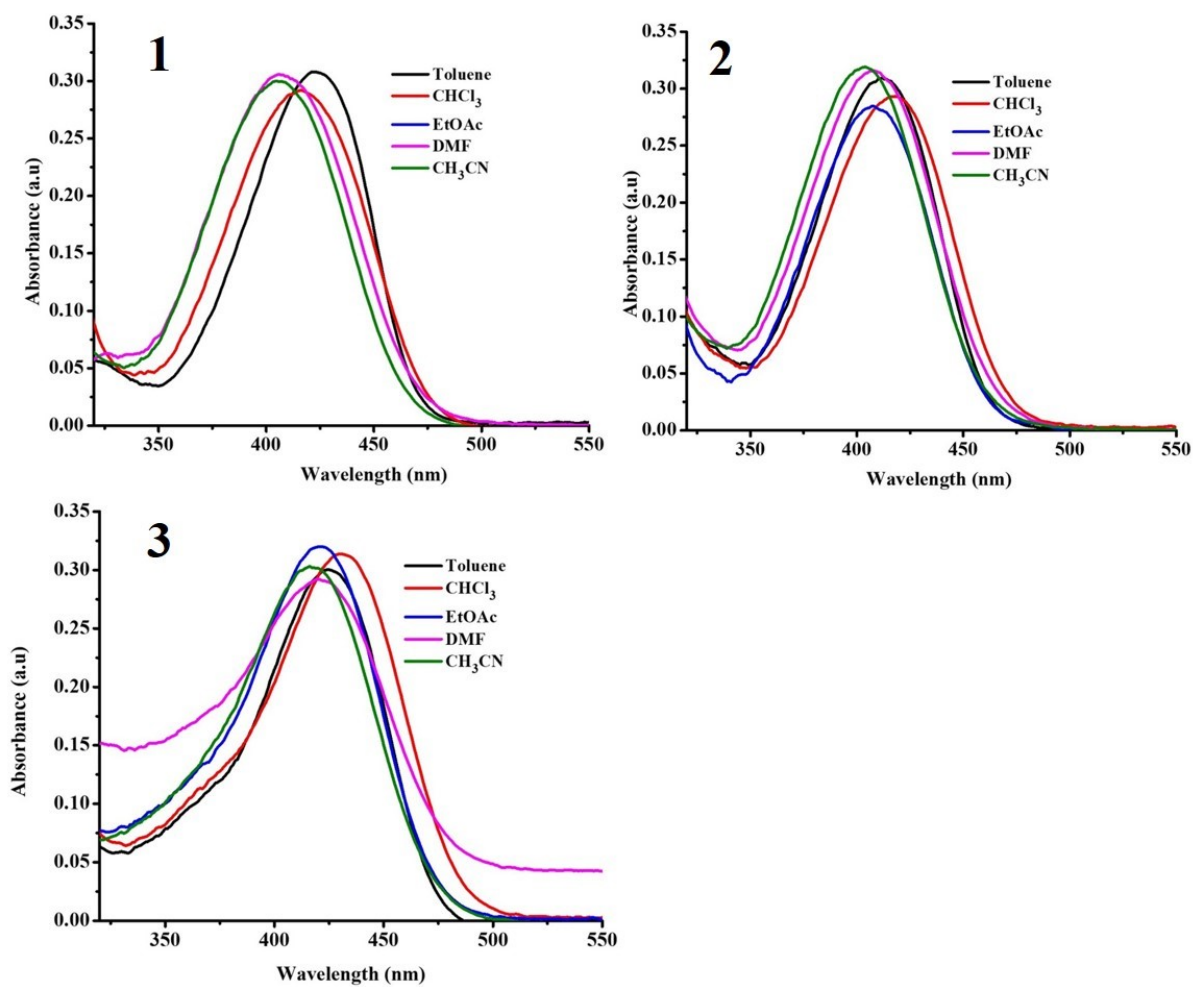

Fig. S4. Absorption spectra of **4-6** in different solvents ( $10^{-4}$  M).

Table S1. Fluorescence efficiency of **1-6** compared to quinine sulfate in different solvent polarity.

| Solvents           | Quantum Yield ( $\Phi_f$ ) |       |       |       |       |       |
|--------------------|----------------------------|-------|-------|-------|-------|-------|
|                    | 1                          | 2     | 3     | 4     | 5     | 6     |
| Toluene            | 0.142                      | 0.28  | 0.095 | 0.036 | 0.21  | 0.085 |
| CHCl <sub>3</sub>  | 0.116                      | 0.09  | 0.068 | 0.035 | 0.096 | 0.051 |
| Ethyl acetate      | 0.132                      | 0.25  | 0.088 | 0.033 | 0.023 | 0.031 |
| DMF                | 0.160                      | 0.163 | 0.13  | 0.030 | 0.059 | 0.036 |
| CH <sub>3</sub> CN | 0.051                      | 0.16  | 0.098 | 0.025 | 0.085 | 0.015 |

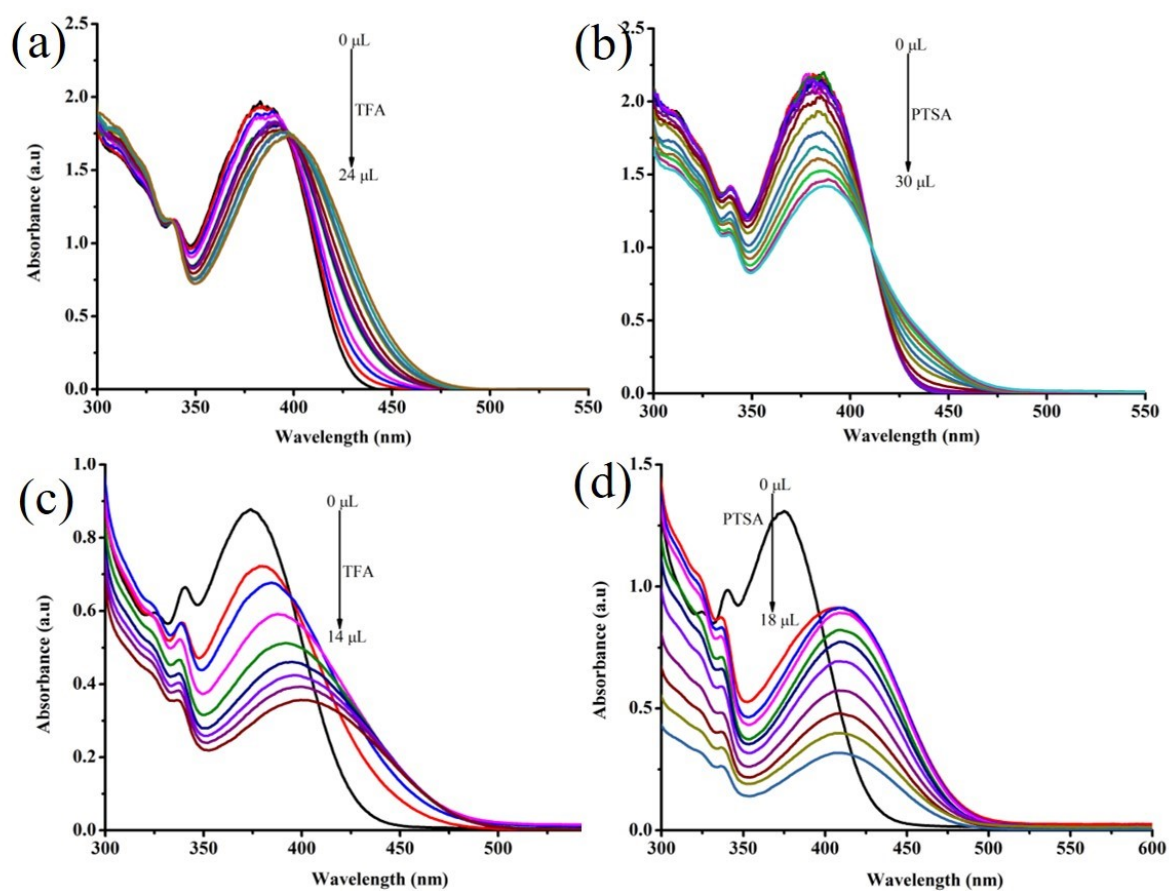

Fig. S5. Absorption changes of **2** (10<sup>-4</sup> M) upon addition of (a, c) TFA (10<sup>-2</sup> M) and (b, d) PTSA (10<sup>-2</sup> M) in (a, b) toluene and (c, d) CHCl<sub>3</sub>.



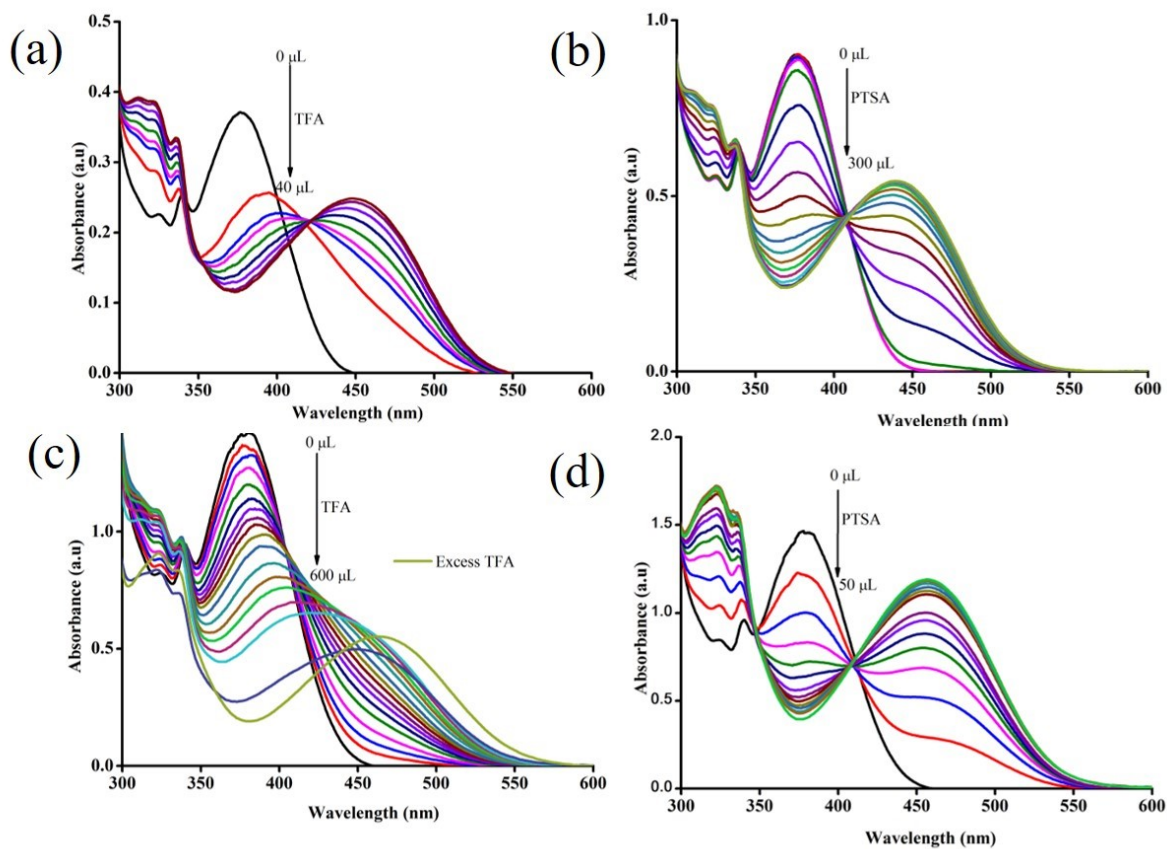

Fig. S6. Absorption changes of **3** ( $10^{-4}$  M) upon addition of (a, c) TFA ( $10^{-2}$  M) and (b, d) PTSA ( $10^{-2}$  M) in (a, b) toluene and (c, d)  $\text{CHCl}_3$ .

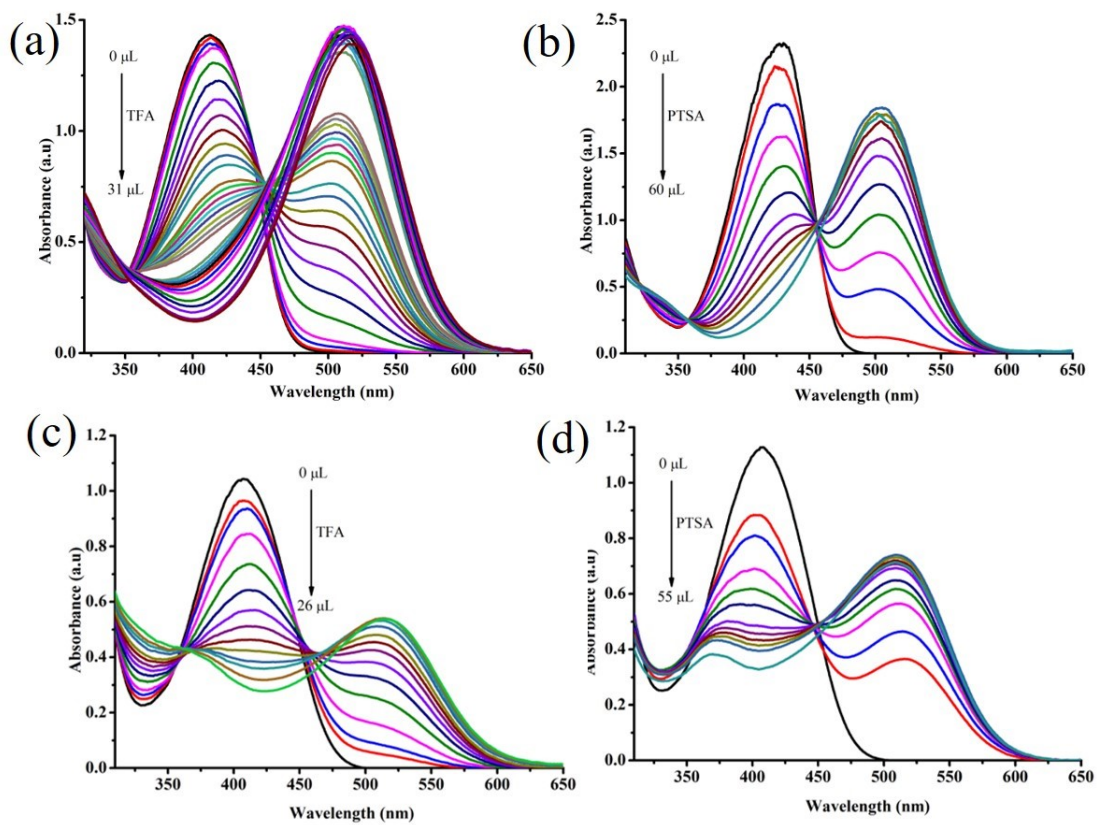

Fig. S7. Absorption changes of **4** ( $10^{-4}$  M) upon addition of (a, c) TFA ( $10^{-2}$  M) and (b, d) PTSA ( $10^{-2}$  M) in (a, b) toluene and (c, d)  $\text{CHCl}_3$ .

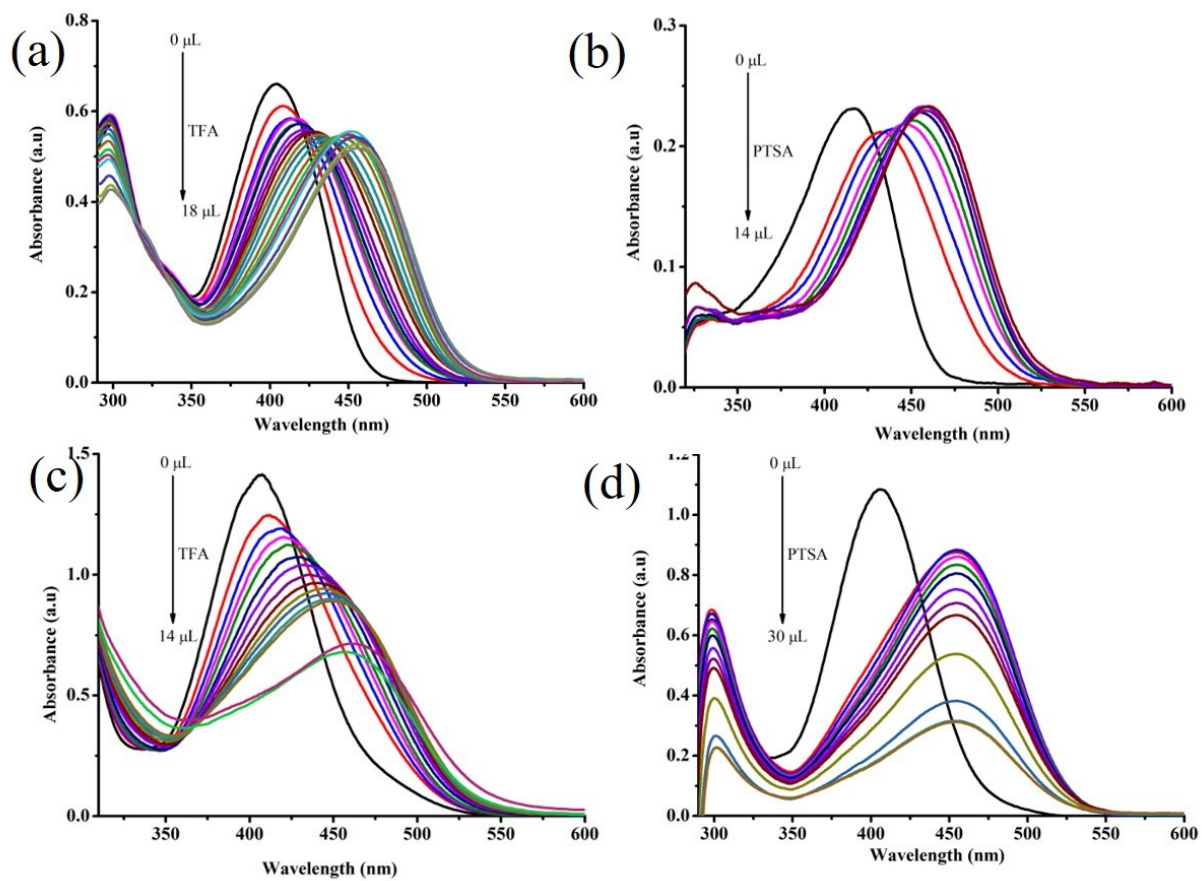

Fig. S8. Absorption changes of **5** ( $10^{-4}$  M) upon addition of (a, c) TFA ( $10^{-2}$  M) and (b, d) PTSA ( $10^{-2}$  M) in (a, b) toluene and (c, d) CHCl<sub>3</sub>.

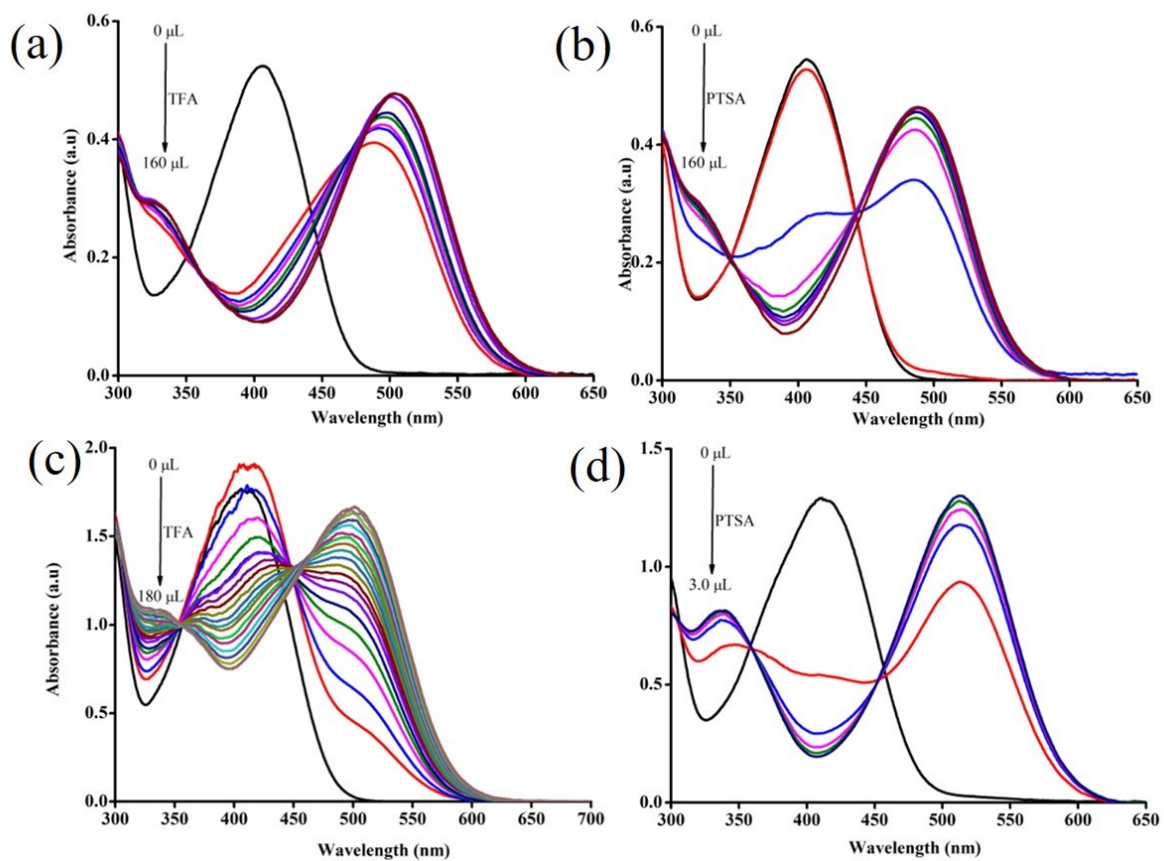

Fig. S9. Absorption changes of **6** ( $10^{-4}$  M) upon addition of (a, c) TFA ( $10^{-2}$  M) and (b, d) PTSA ( $10^{-2}$  M) in (a, b) toluene and (c, d)  $\text{CHCl}_3$ .

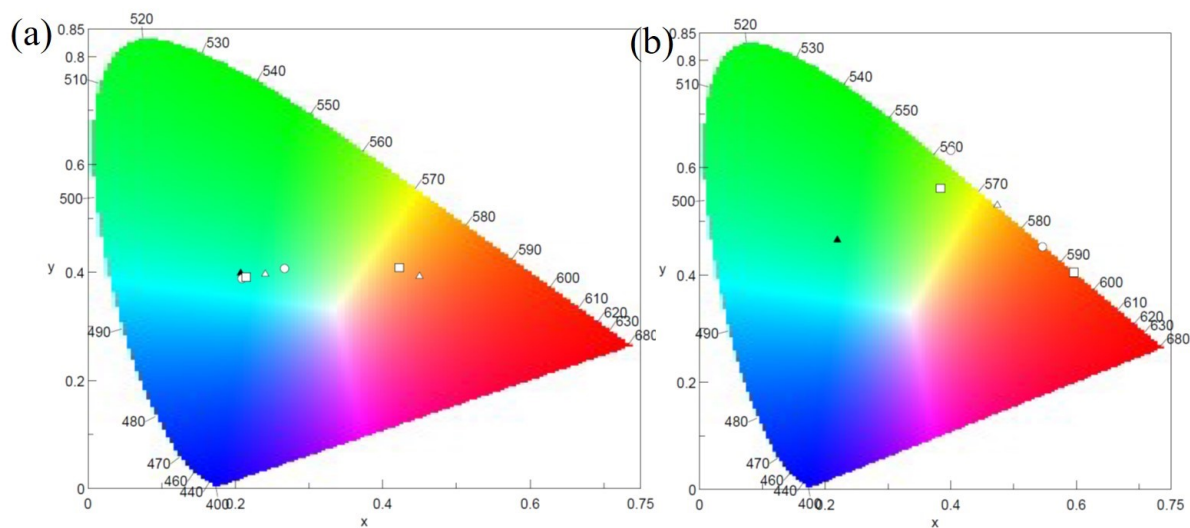

Fig. S10. CIE 1931 chromaticity plot with emission color coordinates of **1** in  $\text{CHCl}_3$  by adding (a) TFA and (b) PTSA ( $10^{-2}$  M).

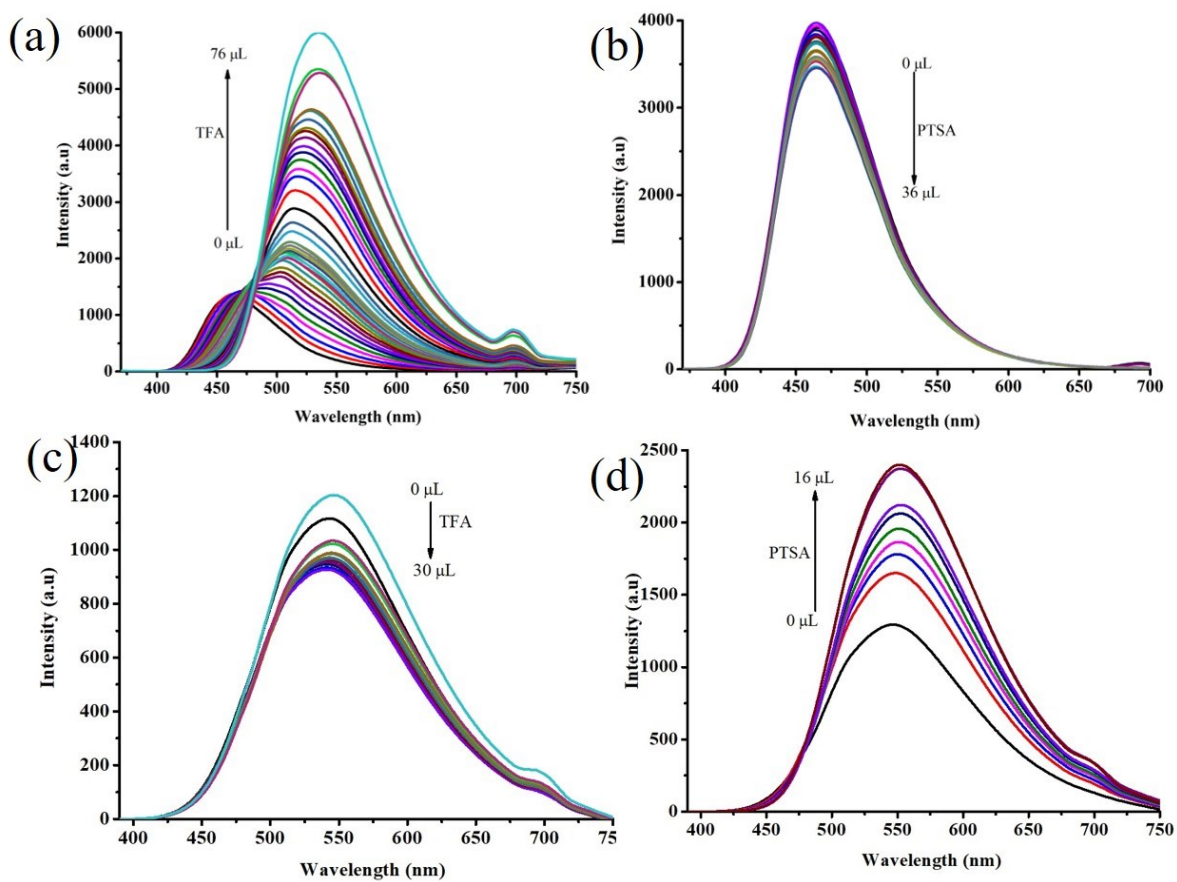

Fig. S11. Fluorescence spectra of **2** ( $10^{-4}$  M) upon addition of (a, c) TFA ( $10^{-2}$  M) and (b, d) PTSA ( $10^{-2}$  M) in (a, b) toluene and (c, d)  $\text{CHCl}_3$ .  $\lambda_{\text{exc}} = 370$  nm.

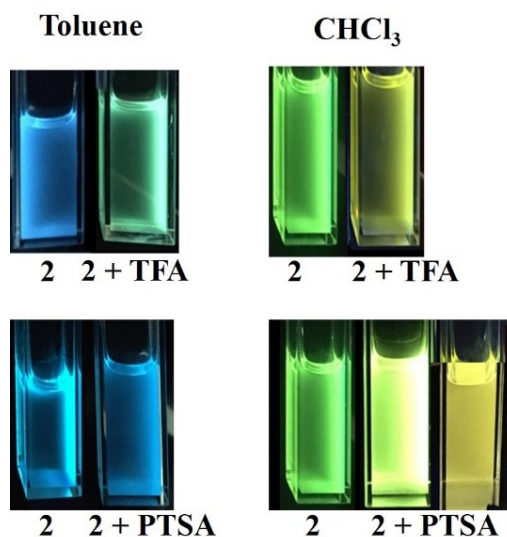

Fig. S12. Digital fluorescence images of **2** ( $10^{-4}$  M) upon addition of TFA ( $10^{-2}$  M) and PTSA ( $10^{-2}$  M) in toluene and  $\text{CHCl}_3$ .  $\lambda_{\text{exc}} = 365$  nm.

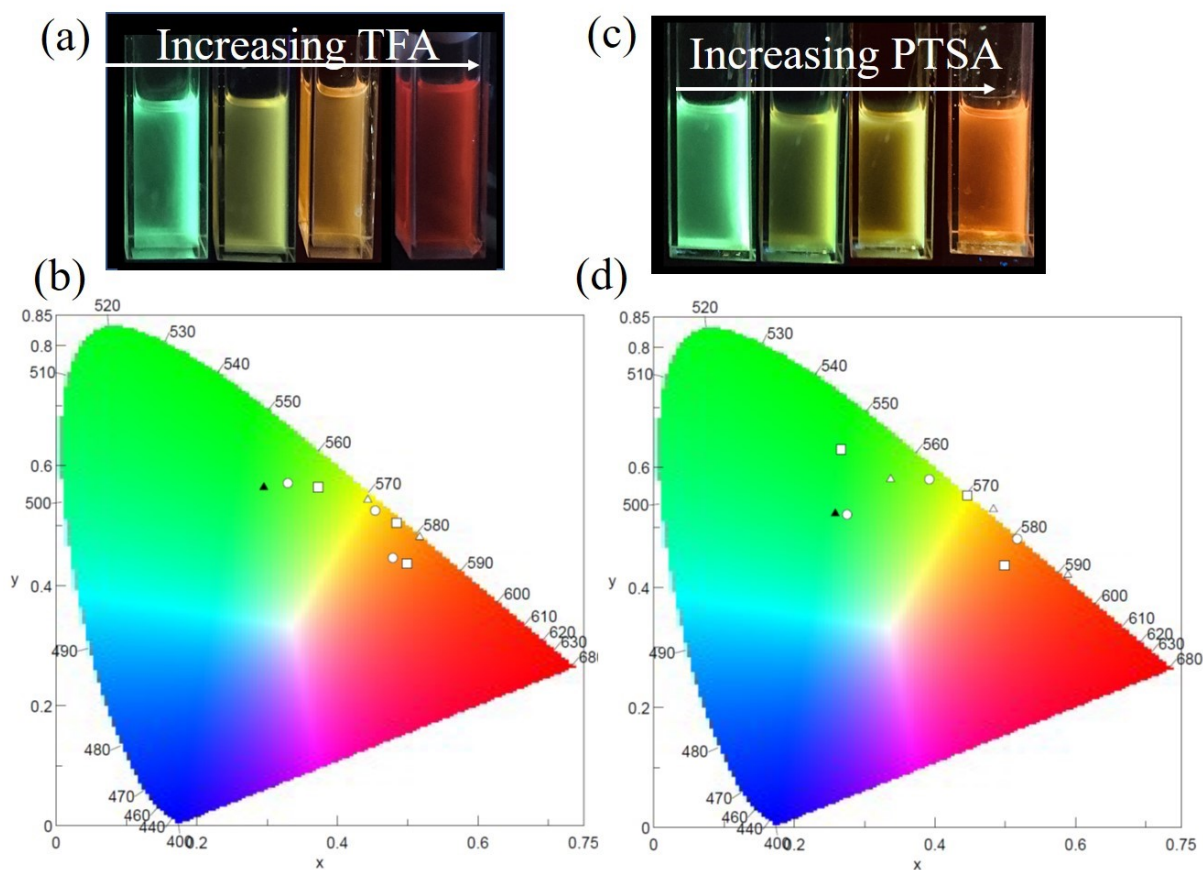

Fig. S13. (a, c) Digital fluorescence images and (b, d) CIE 1931 chromaticity plot with emission colour coordinates of **3** ( $10^{-4}$  M) upon adding (a, b) TFA ( $10^{-2}$  M) and (c, d) PTSA ( $10^{-2}$  M) in  $\text{CHCl}_3$ .  $\lambda_{\text{exc}} = 365$  nm (for digital images) and 370 nm (for spectra)..

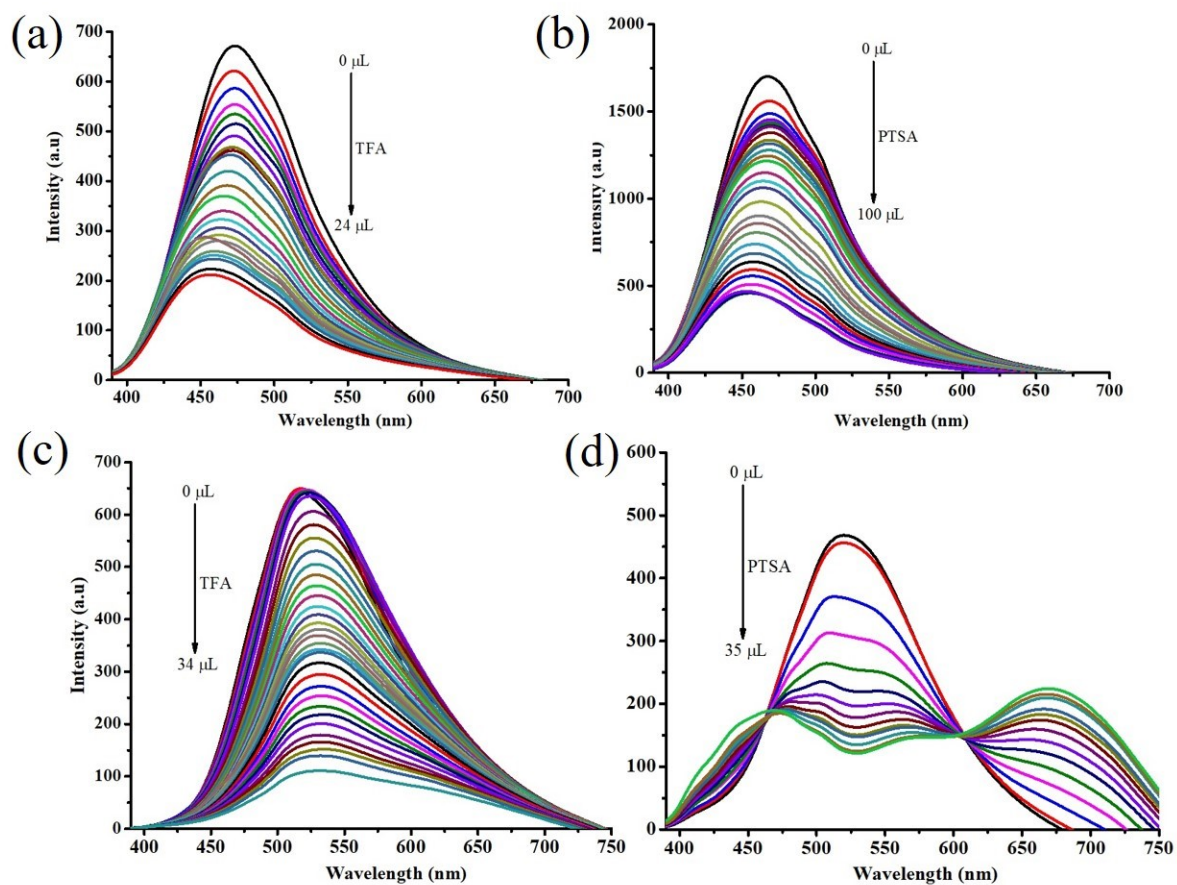

Fig. S14. Fluorescence spectra of **5** ( $10^{-4}$  M) upon addition of (a, c) TFA ( $10^{-2}$  M) and (b, d) PTSA ( $10^{-2}$  M) in (a, b) toluene and (c, d)  $\text{CHCl}_3$ .  $\lambda_{\text{exc}} = 370$  nm.

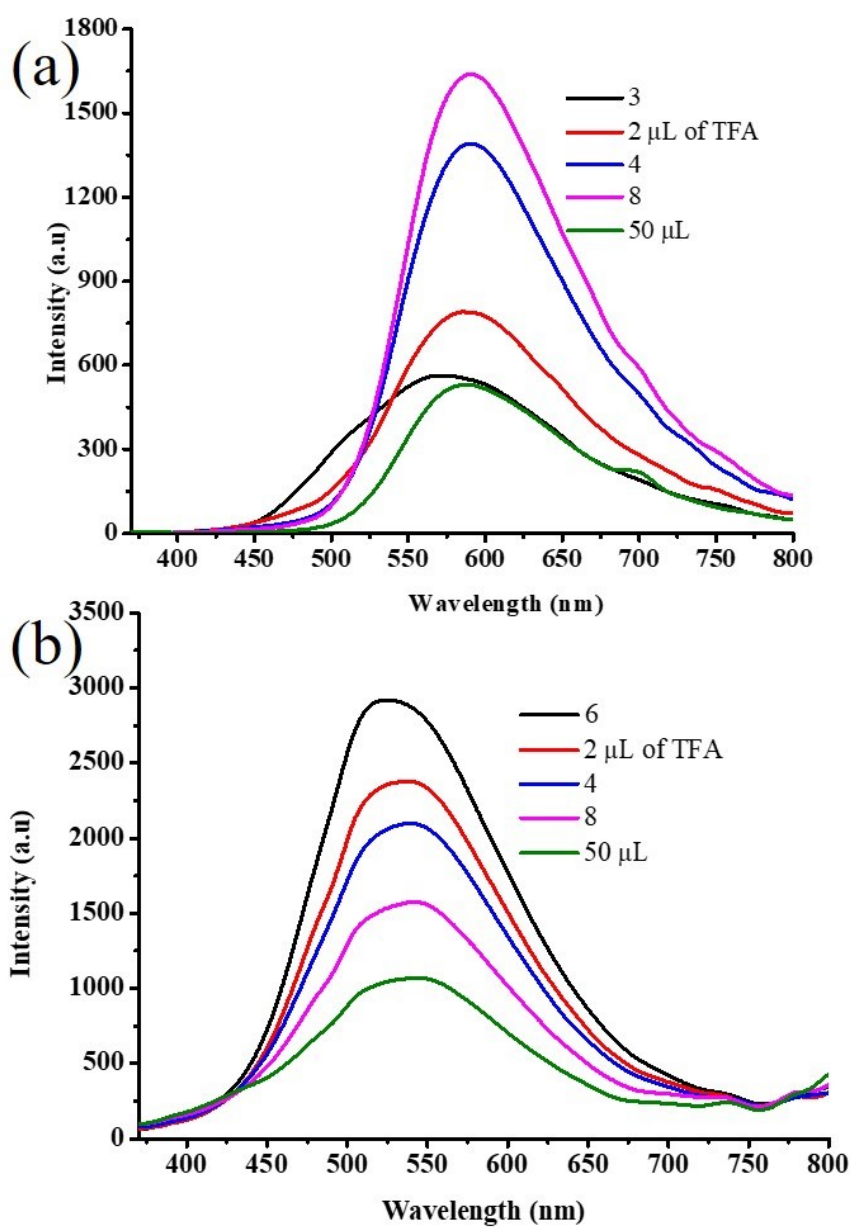

Fig. S15. Fluorescence spectra of (a) **3** ( $10^{-4}$  M) and (b) **6** ( $10^{-4}$  M) upon addition of TFA ( $10^{-2}$  M) in DMF.  $\lambda_{\text{exc}} = 370$  nm..



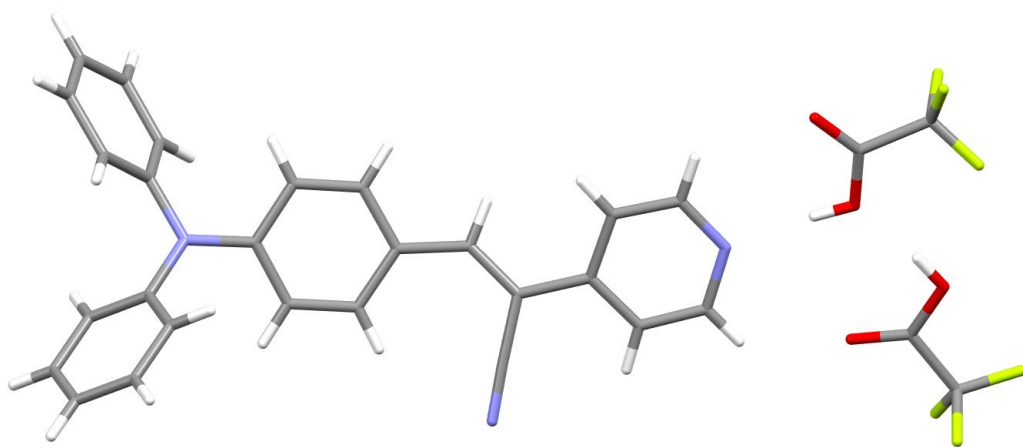

Fig. S16. Molecular structure of 6-TFA in the crystal lattice.

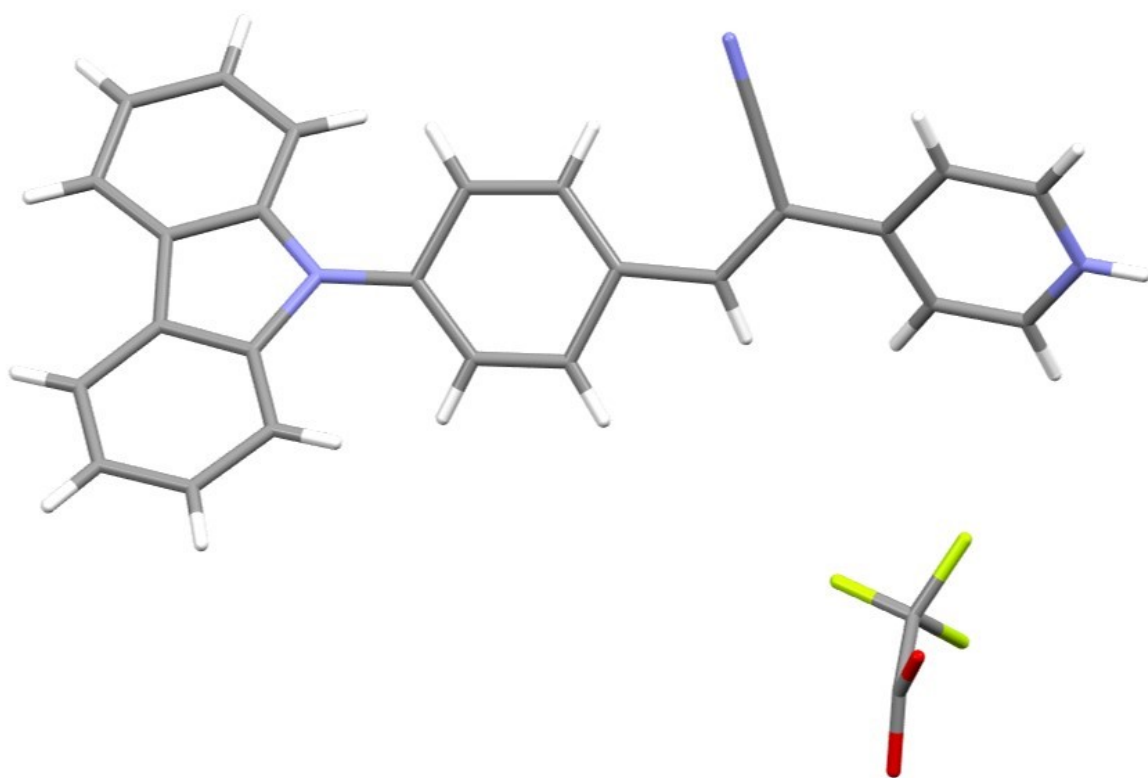

Fig. S17. Molecular structure of 3-TFA in the crystal lattice.

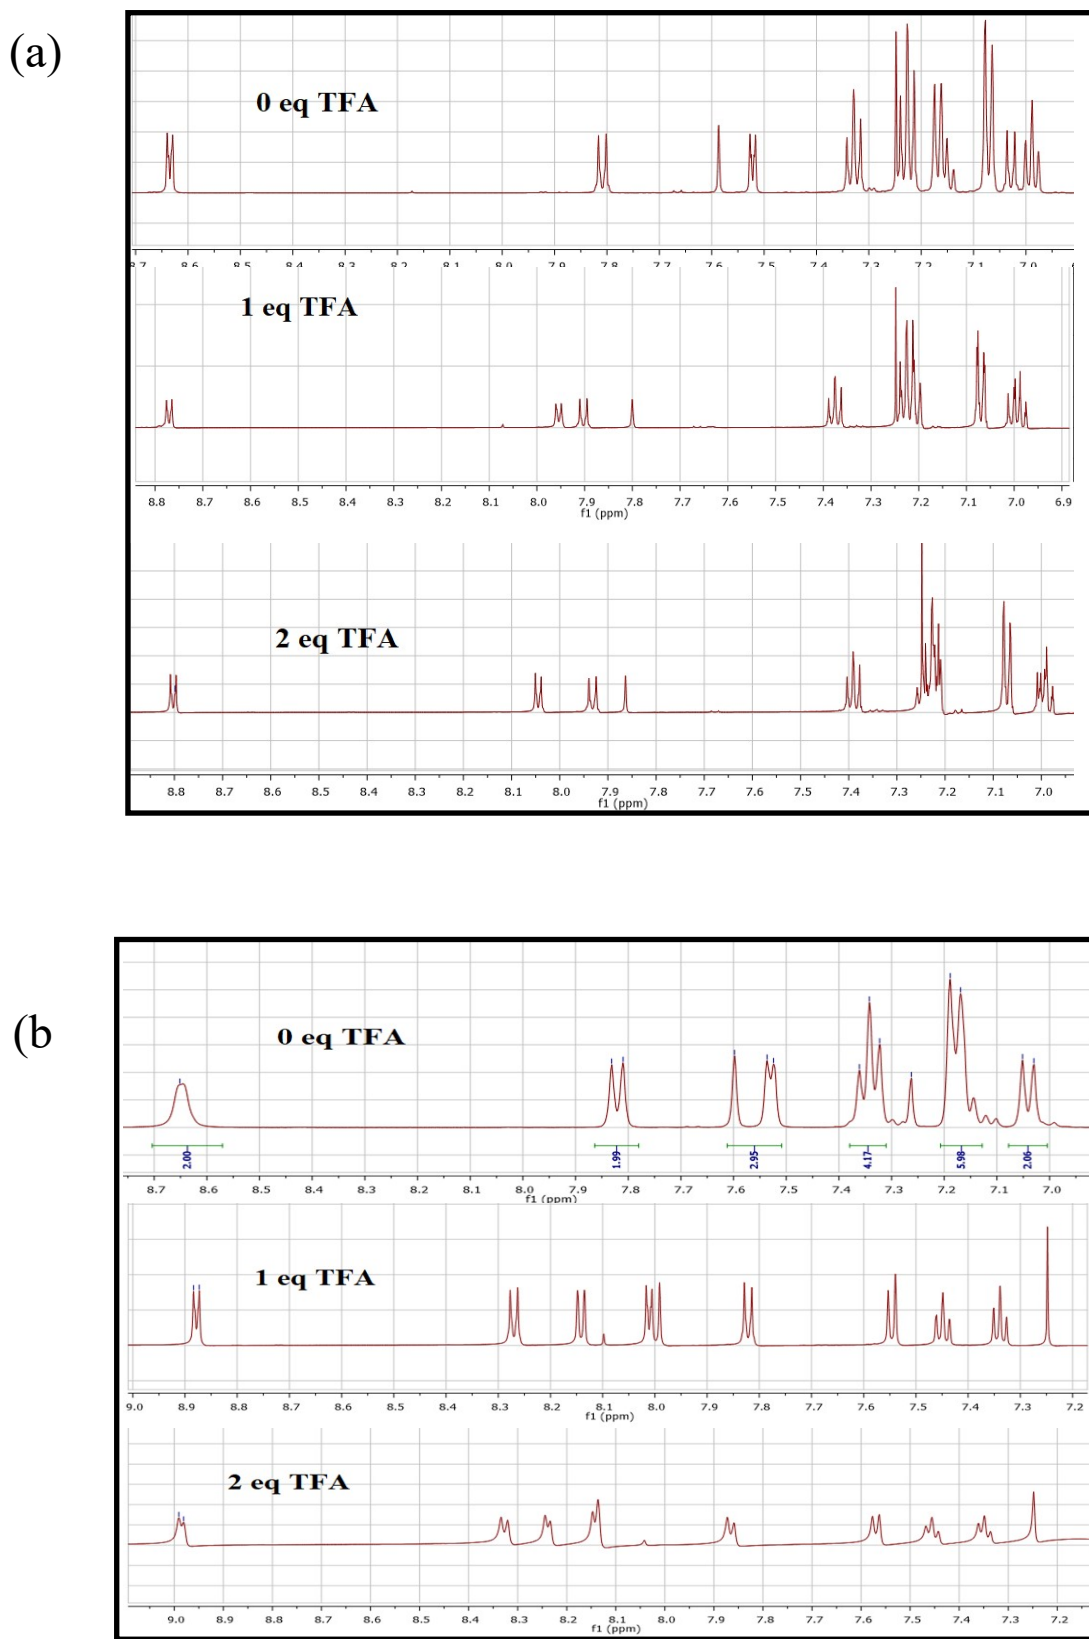

Fig. S18. NMR spectra of (a) 3 and 3-TFA and (b) 6 and 6-TFA.

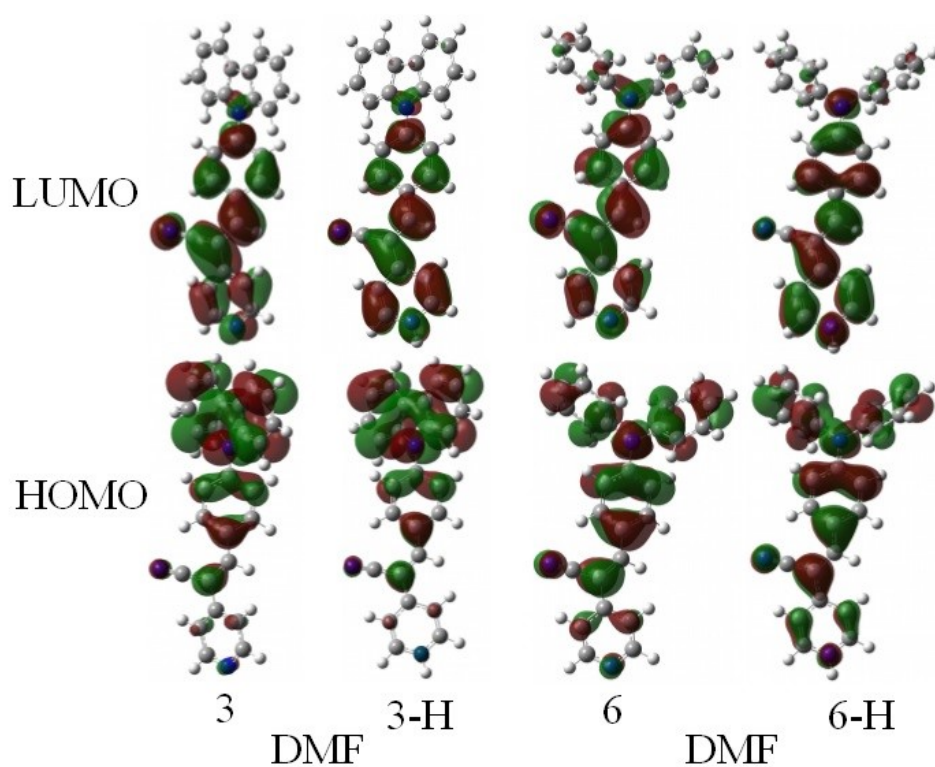

Fig. S19. Calculated frontier orbital for **3**, **3-H**, **6** and **6-H** in DMF.

Table S2. Calculated energy level of HOMO, LUMO and optical band gap.

|            |                   | HOMO (eV) | LUMO (eV) | Band gap (eV) |
|------------|-------------------|-----------|-----------|---------------|
| <b>3</b>   | Toluene           | -5.57     | -2.49     | -3.08         |
|            | CHCl <sub>3</sub> | -5.57     | -2.48     | -3.09         |
|            | DMF               | -5.58     | -2.47     | -3.11         |
| <b>3-H</b> | Toluene           | -6.49     | -4.50     | -1.99         |
|            | CHCl <sub>3</sub> | -6.07     | -3.89     | -2.18         |
|            | DMF               | -5.74     | -3.32     | -2.42         |
| <b>6</b>   | Toluene           | -5.29     | -2.21     | -3.08         |
|            | CHCl <sub>3</sub> | -5.29     | -2.23     | -3.06         |
|            | DMF               | -5.29     | -2.25     | -3.04         |
| <b>6-H</b> | Toluene           | -6.50     | -4.15     | -2.35         |
|            | CHCl <sub>3</sub> | -6.02     | -3.59     | -2.43         |
|            | DMF               | -5.62     | -3.08     | -2.54         |

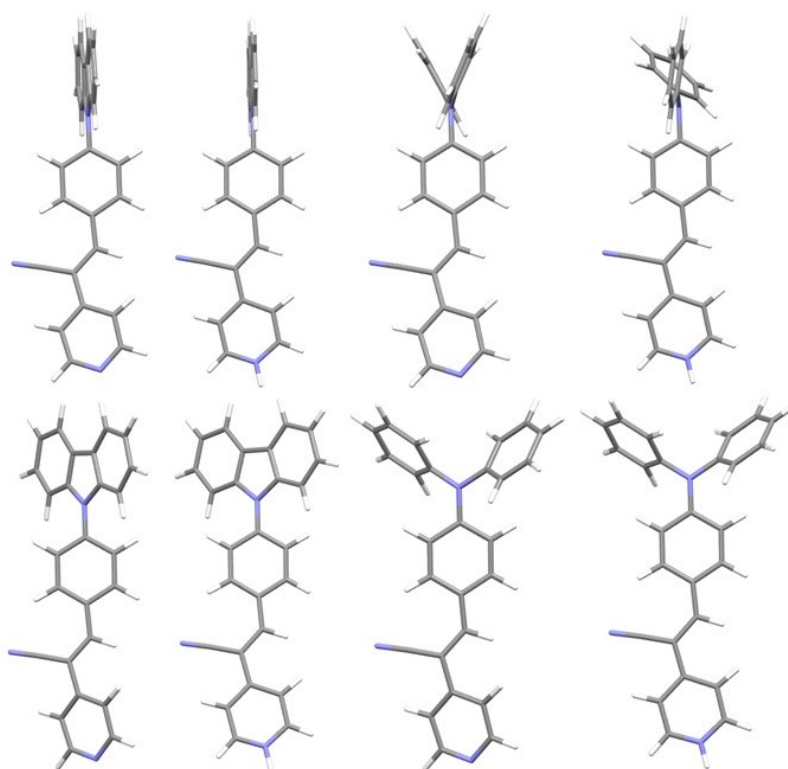

Fig. S20. Calculated ground and excited state (S1) molecular conformation of (a) **3** and **3-H** and (b) **6** and **6-H** in toluene.

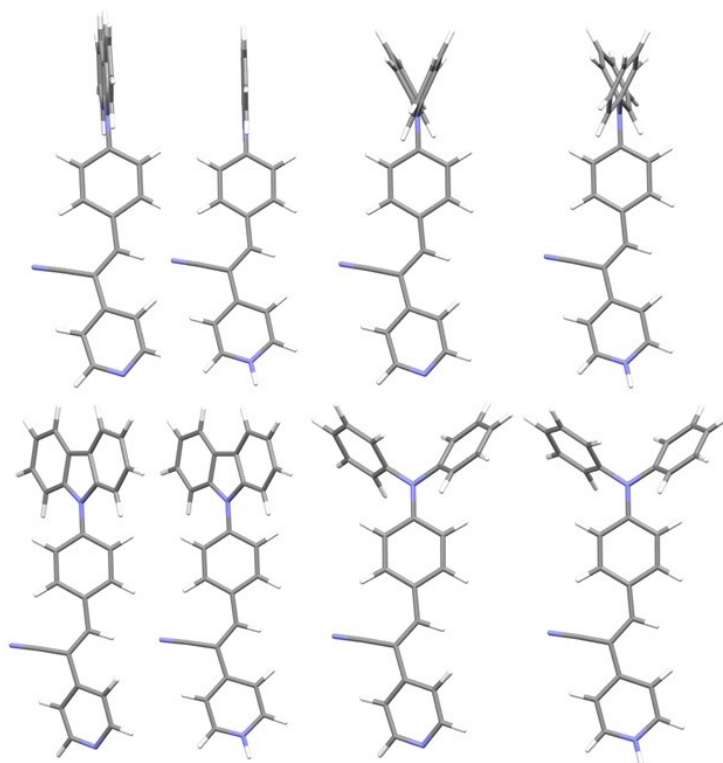

Fig. S21. Calculated ground and excited state (S1) molecular conformation of (a) **3** and **3-H** and (b) **6** and **6-H** in  $\text{CHCl}_3$ .

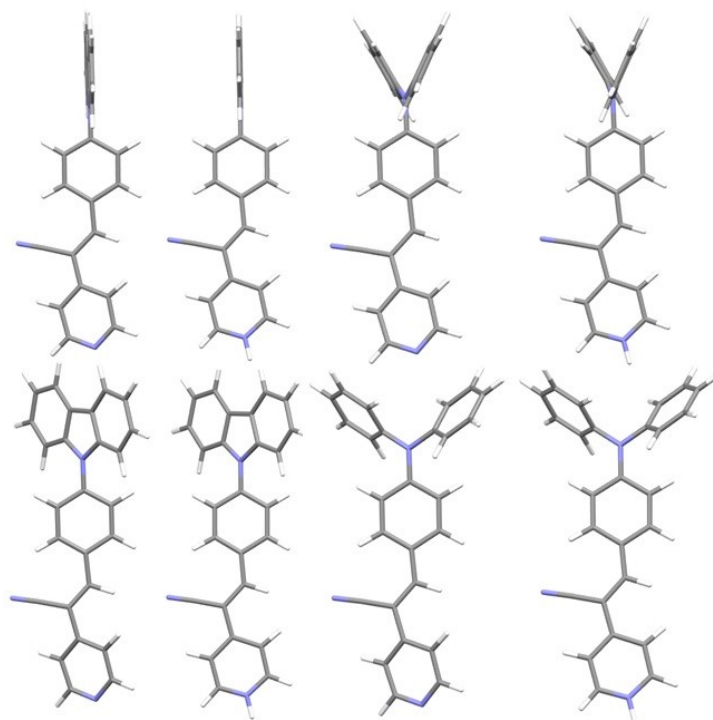

Fig. S22. Calculated ground and excited state (S1) molecular conformation of (a) **3** and **3-H** and (b) **6** and **6-H** in DMF.

Table S3. Comparison of torsion angle of ground/excited state **3** and **6** (protonated/deprotonated) in different solvents.

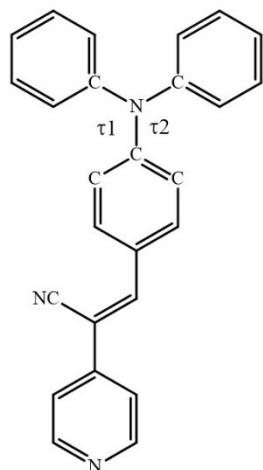

|            |                   | Ground state               |                            | Excited state (S1)         |                            |
|------------|-------------------|----------------------------|----------------------------|----------------------------|----------------------------|
|            |                   | Torsion angle ( $\tau_1$ ) | Torsion angle ( $\tau_2$ ) | Torsion angle ( $\tau_1$ ) | Torsion angle ( $\tau_2$ ) |
| <b>3</b>   | Toluene           | 49.69                      | 49.36                      | 89.48                      | 89.49                      |
|            | CHCl <sub>3</sub> | 49.85                      | 49.55                      | 89.28                      | 89.14                      |
|            | DMF               | 50.10                      | 49.84                      | 85.40                      | 85.34                      |
| <b>3-H</b> | Toluene           | 42.20                      | 42.13                      | 89.69                      | 90.38                      |
|            | CHCl <sub>3</sub> | 43.94                      | 43.58                      | 89.99                      | 90.51                      |
|            | DMF               | 46.19                      | 46.08                      | 90.24                      | 90.13                      |
| <b>6</b>   | Toluene           | 27.96                      | 27.69                      | 84.71                      | 85.15                      |
|            | CHCl <sub>3</sub> | 27.16                      | 26.56                      | 81.21                      | 81.44                      |
|            | DMF               | 26.18                      | 25.52                      | 72.87                      | 72.94                      |
| <b>6-H</b> | Toluene           | 18.86                      | 18.26                      | 81.22                      | 96.60                      |
|            | CHCl <sub>3</sub> | 19.45                      | 18.97                      | 91.87                      | 91.40                      |
|            | DMF               | 20.67                      | 20.06                      | 85.44                      | 85.30                      |
